# Supplementary material
Source: Elsevier journal article supplement (https://www.sciencedirect.com/science/article/pii/S2211912416300013)
Supplement: mmc1 [file 1-s2.0-S2211912416300013-mmc1.pdf]

## **Supplementary information to the manuscript**

### ***Livestock: on our plates or eating at our table? A new analysis of the feed/food debate***

**Anne Mottet<sup>a</sup>, Cees de Haan<sup>b</sup>, Alessandra Falcucci<sup>a</sup>, Giuseppe Tempio<sup>a</sup>, Carolyn Opio<sup>a</sup>, and  
Pierre Gerber<sup>a, c</sup>**

<sup>a</sup> Food and Agriculture Organization of the United Nations, Animal Production and Health  
Division, Viale delle Terme di Caracalla, 00153 Rome, Italy

<sup>b</sup> Independent consultant, the Netherlands.

<sup>c</sup> Animal Production Systems group, Wageningen University, P.O. Box 338,  
Wageningen, the Netherlands.

#### **Contents**

|                                                                                 |    |
|---------------------------------------------------------------------------------|----|
| 1. Overview of the Global Livestock Environmental Assessment Model - GLEAM..... | 1  |
| 2. Data resolution and disaggregation.....                                      | 2  |
| 3. Farming systems and herd simulation .....                                    | 2  |
| 4. Modeling of feed rations .....                                               | 4  |
| 5. Allocation method for land-use to different co-products .....                | 13 |
| 6. Projections of sector's trends .....                                         | 15 |
| 7. Validation of feed ration by literature review .....                         | 16 |
| 8. References of the Supplementary Information .....                            | 17 |
| 9. References from the literature review presented in Table SI 16.....          | 19 |

#### **1. Overview of the Global Livestock Environmental Assessment Model - GLEAM**

Feed rations were estimated with the Global Livestock Environmental Assessment Model (GLEAM, Gerber et al., 2013) developed at FAO. GLEAM is a spatially explicit model that represents bio-physical processes and activities along livestock supply chains under a life cycle assessment approach. It has a high level of quantitative details on herd production functions and resource flows, with the aim of exploring the environmental implications of production practices for the main commodities, farming systems and regions.

GLEAM covers the 11 main livestock commodities at global scale, namely meat and milk from cattle, sheep, goats and buffalo; meat from pigs; and meat and eggs from chickens. The model, which runs in a Geographic Information System (GIS) environment, provides spatially disaggregated information for a given production system, thereby enabling calculation for any combination of commodity, farming systems and location at different spatial scales.

GLEAM is built on five modules reproducing the main stages of livestock production: the herd module, the manure module, the feed module, the system module and the allocation module. The herd module determines the structure of the herd and the characteristics of the average

animal in each cohort (defined as a class of animals within a herd or flock grouped by their age and sex). The manure module calculates the rate at which the nitrogen is excreted and deposited on pastures and crops. Feed rations and associated land are calculated within the feed module. The system module calculates the animals' energy requirements and total production of meat, milk and eggs. Greenhouse gas emissions from different sources are allocated to products and services (milk, meat and eggs, fiber and draught draft power) in the allocation module. For the assessment of livestock feed rations, only the herd module, the feed module and the system module were used. A full description of the model, the variables and the equations are available for download from <http://www.fao.org/gleam/resources>. This document summarizes the main features used for the assessment of feed rations.

## **2. Data resolution and disaggregation**

Data on production practices and productivity were collected from the literature and experts consultations at different levels of aggregation: production systems, country levels, agro-ecological zones, or a combination thereof. Additional data, such as livestock numbers, pasture and availability of feedstuffs was available in the form of GIS grids (raster layers). GIS can store observed data for specific locations and it can model new information from these data, as well as calculate regional summaries. The use of GIS thus permits incorporation of spatial heterogeneity into the modelling process. In this way, feed rations can be estimated for any location of the globe, using the most accurate information available at this scale of analysis, and then aggregated along the desired category, such as farming systems, country group, commodity and animal species. Data collection involved extensive research of databases, literature sources and expert opinion. The study's main data sources included:

- Gridded Livestock of the World (Robinson et al., 2014);
- Geo-referenced databases on crop yields and harvested areas (IIASA/FAO, 2012);
- Gross primary production for grassland (Haberl et al., 2007);
- Reports from the Consultative Group on International Agricultural Research (CGIAR);
- Statistics from FAO (FAOSTAT, 2015);
- Peer-reviewed journals.

In its second version, GLEAM 2.0 incorporates over 9,000 discrete supply chains, defined here as unique combinations of commodity, farming system, country and agro-ecological zone. The geographical area corresponding to each of these sets is further decomposed into GLEAM production units: grid cells, or pixels, with a resolution of 5 arc minutes, or ca. 10 km x 10 km at the equator.

## **3. Farming systems and herd simulation**

A farming system typology was adapted from the classification principles set out by Seré & Steinfeld (1996), namely, the feed-base and the agroecological conditions of production systems. GLEAM 1.0 differentiates the 11 main livestock commodities: meat and milk from cattle, sheep, goats and buffalo; meat from pigs and meat and eggs from chickens. Ruminant production is differentiated into feedlot (for beef only), mixed and grazing systems; pig production into backyard, intermediate and industrial systems and chicken production into backyard, layers and broilers (Table SI 1).

Table SI 1. Characteristics of livestock production systems used in GLEAM

| Production system       | Characteristics                                                                                                                                                                                                                                                           | Housing                                                                                                                                                                       |
|-------------------------|---------------------------------------------------------------------------------------------------------------------------------------------------------------------------------------------------------------------------------------------------------------------------|-------------------------------------------------------------------------------------------------------------------------------------------------------------------------------|
| <b>Ruminant species</b> |                                                                                                                                                                                                                                                                           |                                                                                                                                                                               |
| Grazing systems         | Livestock production systems in which more than 10 percent of the dry matter fed to animals is farm-produced and in which annual average stocking rates are less than ten livestock units per hectare of agricultural land.                                               | Not applicable                                                                                                                                                                |
| Mixed systems           | Livestock production systems in which more than 10 percent of the dry matter fed to animals comes from crop by-products and/or stubble or more than 10 percent of the value of production comes from non-livestock farming activities.                                    | Not applicable                                                                                                                                                                |
| Feedlots                | Fully market-oriented and specialized feeding operations which fatten animals prior to slaughter. A high share of the diet consists of high-energy feed materials.                                                                                                        | Although it can vary among different operations, animals are kept in fully enclosed areas to facilitate the fattening process.                                                |
| <b>Pigs</b>             |                                                                                                                                                                                                                                                                           |                                                                                                                                                                               |
| Backyard                | Mainly subsistence driven or for local markets; level of capital inputs reduced to the minimum; herd performance lower than commercial systems; feed contains maximum 20 percent of purchased non-local feed; high shares of swill, scavenging and locally-sourced feeds. | Partially enclosed: no concrete floor, or if any pavement is present, made with local material. Roof and support made of local materials (e.g. mud bricks, thatch or timber). |
| Intermediate            | Fully market-oriented; medium capital input requirements; reduced level of overall herd performance (compared with industrial); locally-sourced feed materials constitute 30 to 50 percent of the ration.                                                                 | Partially enclosed: no walls (or made of a local material if present), solid concrete floor, steel roof and support.                                                          |
| Industrial              | Fully market-oriented; high capital input requirements (including infrastructure, buildings, equipment); high level of overall herd performance; purchased non-local feed in diet or on-farm intensively produced feed.                                                   | Fully enclosed: slatted concrete floor, steel roof and support, brick, concrete, steel or wood walls.                                                                         |
| <b>Chicken</b>          |                                                                                                                                                                                                                                                                           |                                                                                                                                                                               |
| Backyard                | Animals producing meat and eggs for the owner and local market, living freely. Diet consists of swill and scavenging (20 to 40 percent) while locally-produced feed constitutes the rest.                                                                                 | Simple housing using local wood, bamboo, clay, leaf material and handmade construction resources for supports plus scarp wire netting walls and scrap iron for roof.          |
| Layers                  | Fully market-oriented; high capital input requirements; high level of overall flock productivity; purchased non-local feed or on-farm intensively produced feed.                                                                                                          | Layers housed in a variety of cage, barn and free-range systems, with automatic feed and water provision.                                                                     |
| Broilers                | Fully market-oriented; high capital input requirements; high level of overall flock productivity; purchased non-local feed or on-farm intensively produced feed.                                                                                                          | Broilers assumed to be primarily loosely housed on litter, with automatic feed and water provision.                                                                           |

The cattle feedlot system was added in GLEAM 2.0, using the following methodology. Input data were collected about: total animal in feedlots at the lowest administrative level possible, average feedlot capacity, number of days of the fattening cycle, feedlot herd parameters, average feed rations and manure management. All data required were obtained through literature review and expert opinion and, depending on the availability, at national or sub-national level. Sources of information include national statistics, Agribenchmark (2013) and consultations with national experts. In the global grid used for livestock distribution, cells with the highest density of cattle were classified as having feedlot systems. For each administrative unit where a number of cattle on feed was available, cells were ranked according to the animal density and iteratively extracted

starting from the highest density one. The extraction continued until reaching a total number of animals that was less than or equal to a maximum threshold defined for each administrative unit. The threshold accounted for the total number of animals in feedlot systems in one year and was calculated multiplying the average feedlot capacity by the number of fattening cycles along the year. Once the spatial distribution of feedlot systems was defined, all animals in the selected cells were considered as fattening animals and their dynamic was integrated and modeled with the rest of the herd according to the specific herd parameters available for feedlots. All subsequent evaluation performed by the model for these systems were then executed using their specific input parameters about animal productivity, feed rations and manure management.

#### **4. Modeling of feed rations**

Feed rations were modeled differently for ruminants and monogastrics. For ruminants, in industrialized regions, the composition and relative portions of the feed ration materials are taken from national inventory reports, literature and targeted surveys. For developing countries, due to scanty information, a feed allocation scheme was developed based on the availability of feed resources (yields of crops and forage) and animals requirements (energy). First, the proportion of by-products and concentrates in the ration was defined based on surveys, literature and expert knowledge. The total roughage availability in each pixel is calculated based on the dry matter (DM) yields per hectare of pasture, fodder and crop residues and the land area of the respective feeds. Data for this calculation was obtained from a number of sources: FAOSTAT for specific crops (e.g. soybean and palm); GAEZ for 20 crops; and Haberl et al. (2007) to estimate the above-ground net primary productivity for pasture. Feed requirements, based on energy for maintenance, labor, grazing, gestation and lactation, for all ruminant species, were then assessed by expressing the different ruminant species and categories of animals in cattle equivalent, to take into account the fact that these animals are competing for the same feed resource. To assess the feed availability, a ratio between the total roughage availability and ruminant species biomass was obtained. Total ruminant annual feed requirements were then checked based on the assumption that an animal consumes about 2 to 3 percent of its bodyweight on a daily basis and hence, on an annual basis, DMI will range between 7.3 and 14 kg DM. The total amount of roughage feed available was then compared to the animal feed requirements within each cell to provide an indication of feed adequacy in terms of sufficiency, deficiency or surplus for any given location. In situations where ample feed is not available to meet the requirements of the animals, the feed ration is supplemented with leaves and hay. The proportion of each roughage material within the feed ration was then obtained by dividing the quantity available of each roughage material by the total available roughage. The proportions of roughages plus the by-products and concentrate proportions form the total feed ration.

For monogastrics, feed materials were divided into three main categories: swill and scavenging, non-local feed materials and locally-produced feed materials. The proportions of the three main feed groups making up the ration were defined for each of the production systems, based on literature and expert knowledge. The proportion of the non-local feeds was defined for each country, where possible, using availability (yields) and existing literature: FAO (2001); Ndindana et al. (2002); Tra (2003); van der Werf et al. (2005); Grant Clark et al. (2005); FAO (2006); Hu (2007) and Rabobank (2008); FAO (2003); Petri and Lemme (2007); Thiele and Pottgüter (2008); Pelletier (2008); FAO (2010); Wiedemann and McGahan (2011); Nielsen et al. (2011); CEREOPA (2011);

Jeroch (2011); Leinonen et al. (2012a, 2012b) and Wiedemann et al. (2012). Gaps in the literature were filled through discussions with experts (both within FAO and the industry) and also through primary data gathering (a questionnaire survey of commercial egg producers was undertaken with the assistance of the International Egg Commission).

Tables SI 2 and SI 3 present the summary of the feed intake and rations by animal and by country groups, production systems and feed material. Tables SI 4 to SI 14 present detailed average rations for the different livestock production systems at regional level. Regions are reported using the following abbreviations: NA (North America), RUSS (Russian Federation), WE (Western Europe), EE (Eastern Europe), NENA (Near East and North Africa), ESEA (East and Southeast Asia), OC (Oceania), SA (South Asia), LAC (Latin America and the Caribbean) and SSA (Sub-Saharan Africa)

Table SI 2. Global livestock feed intake by regions, species and systems (Million tones/year)

|          |                    |              | Total intake | Roughages | Swill | Cereal grains | 2nd grade grain | Brans, spent brewer and biofuel grains | Soybean cakes | Other oil seed cakes | Other edible | Other non-edible | Total human-edible feed intake | Total in competition with food production |
|----------|--------------------|--------------|--------------|-----------|-------|---------------|-----------------|----------------------------------------|---------------|----------------------|--------------|------------------|--------------------------------|-------------------------------------------|
| Non OECD | Cattle & buffaloes | Grazing      | 1,148        | 1,092     | -     | 10            | -               | 35                                     | 2             | 8                    | -            | 2                | 11                             | 13                                        |
|          |                    | Mixed        | 2,326        | 2,079     | -     | 65            | -               | 112                                    | 12            | 25                   | -            | 34               | 77                             | 88                                        |
|          |                    | Feedlots*    | 37           | 14        | -     | 14            | -               | 6                                      | 1             | 2                    | -            | -                | 15                             | 16                                        |
|          | Small Ruminants    | Grazing      | 215          | 208       | -     | -             | -               | 6                                      | -             | 1                    | -            | -                | -                              | 1                                         |
|          |                    | Mixed        | 238          | 226       | -     | 1             | -               | 9                                      | -             | 1                    | -            | -                | 1                              | 1                                         |
|          | Poultry            | Backyard     | 73           | -         | 28    | -             | 21              | 11                                     | 6             | 3                    | 2            | 1                | 8                              | 15                                        |
|          |                    | Layers       | 141          | -         | -     | 87            | -               | 6                                      | 7             | 6                    | 21           | 14               | 115                            | 123                                       |
|          |                    | Broilers     | 219          | -         | -     | 155           | -               | -                                      | 52            | 2                    | 3            | 6                | 210                            | 262                                       |
|          | Pigs               | Backyard     | 217          | 32        | 42    | -             | 66              | 33                                     | 27            | 11                   | 2            | 3                | 30                             | 57                                        |
|          |                    | Intermediate | 85           | 7         | 3     | 43            | -               | 11                                     | 14            | 2                    | 3            | 2                | 59                             | 73                                        |
|          |                    | Industrial   | 81           | -         | -     | 52            | -               | 5                                      | 14            | 2                    | 4            | 3                | 70                             | 84                                        |
| OECD     | Cattle & buffaloes | Grazing      | 340          | 293       | -     | 24            | -               | 11                                     | 4             | 5                    | -            | 3                | 28                             | 32                                        |
|          |                    | Mixed        | 396          | 307       | -     | 48            | -               | 14                                     | 8             | 11                   | -            | 8                | 56                             | 64                                        |
|          |                    | Feedlots*    | 71           | 17        | -     | 51            | -               | 1                                      | 1             | -                    | -            | 1                | 52                             | 54                                        |
|          | Small Ruminants    | Grazing      | 32           | 29        | -     | 1             | -               | 1                                      | -             | -                    | -            | 1                | 1                              | 1                                         |
|          |                    | Mixed        | 45           | 39        | -     | 1             | -               | 3                                      | -             | -                    | -            | 2                | 1                              | 1                                         |
|          | Poultry            | Backyard     | 1            | -         | -     | -             | -               | -                                      | -             | -                    | -            | -                | -                              | 0                                         |
|          |                    | Layers       | 40           | 0         | -     | 27            | -               | -                                      | 4             | 1                    | 5            | 4                | 36                             | 40                                        |
|          |                    | Broilers     | 124          | -         | -     | 82            | -               | -                                      | 24            | 5                    | 7            | 6                | 113                            | 137                                       |
|          | Pigs               | Backyard     | 6            | 2         | 1     | -             | 2               | 1                                      | -             | -                    | -            | -                | -                              | 0                                         |
|          |                    | Intermediate | 6            | -         | -     | 4             | -               | 1                                      | 1             | -                    | -            | -                | 5                              | 5                                         |
|          |                    | Industrial   | 155          | -         | -     | 105           | -               | 7                                      | 23            | 12                   | 3            | 5                | 131                            | 154                                       |
| World    | Ruminants          |              | 4,849        | 4,304     | -     | 214           | -               | 199                                    | 28            | 53                   | -            | 51               | 242                            | 270                                       |
|          | Monogastrics       |              | 1,147        | 41        | 75    | 554           | 90              | 76                                     | 173           | 45                   | 50           | 43               | 777                            | 949                                       |
|          | All                |              | 5,996        | 4345      | 75    | 768           | 90              | 275                                    | 201           | 98                   | 50           | 95               | 1,019                          | 1,220                                     |

\* Figures reported for fattening phase in feedlots (3 to 6 months). DM = dry matter. Roughages = fresh grass, hay, silage, crop residues such as straws and sugar cane tops, tree leaves and fodder beet. Other oil seed cakes: rape, canola, cotton and palm kernel. Other edible: cassava pellets, beans and unprocessed soy beans, rapeseed and soy oil. Other non-edible: corn gluten feed and meal, pulp, molasses, fish meal, synthetic amino acids, lime. Cereal grains = grains from wheat, maize, barley, millet, rice, sorghum, oat, buckwheat and fonio. In competition with food production: edible + soybean cakes

Table SI 3. Global livestock feed rations by regions, species and systems (kg DM/animal/year)

|          |                    |              | Total intake | Roughages | Swill | Cereal grains | 2nd grade grain | Brans, spent brewer and biofuel grains | Soybean cakes | Other oil seed cakes | Other edible | Other non-edible | Total human-edible feed intake | Total in competition with food production |
|----------|--------------------|--------------|--------------|-----------|-------|---------------|-----------------|----------------------------------------|---------------|----------------------|--------------|------------------|--------------------------------|-------------------------------------------|
| Non OECD | Cattle & buffaloes | Grazing      | 2,680        | 2,550     | -     | 22            | -               | 81                                     | 4             | 21                   | -            | 4                | 22                             | 26                                        |
|          |                    | Mixed        | 2,531        | 2,262     | -     | 73            | -               | 122                                    | 13            | 58                   | -            | 37               | 71                             | 84                                        |
|          |                    | Feedlots*    | 1,784        | 670       | -     | 670           | -               | 307                                    | 44            | 93                   | -            | 9                | 670                            | 714                                       |
|          | Small Ruminants    | Grazing      | 270          | 260       | -     | 1             | -               | 8                                      | -             | 1                    | -            | -                | 1                              | 1                                         |
|          |                    | Mixed        | 238          | 226       | -     | 1             | -               | 9                                      | -             | 1                    | -            | -                | 1                              | 1                                         |
|          | Poultry            | Backyard     | 20           | -         | 8     | -             | 6               | 3                                      | 2             | 1                    | 1            | -                | 1                              | 2                                         |
|          |                    | Layers       | 26           | -         | -     | 16            | -               | 1                                      | 1             | 1                    | 4            | 3                | 20                             | 21                                        |
|          |                    | Broilers     | 34           | -         | -     | 24            | -               | -                                      | 8             | -                    | -            | 1                | 24                             | 32                                        |
|          | Pigs               | Backyard     | 506          | 75        | 99    | -             | 154             | 77                                     | 64            | 25                   | 6            | 7                | 6                              | 69                                        |
|          |                    | Intermediate | 563          | 46        | 23    | 285           | -               | 73                                     | 91            | 14                   | 19           | 10               | 305                            | 395                                       |
|          |                    | Industrial   | 628          | 1         | -     | 408           | -               | 42                                     | 109           | 14                   | 30           | 24               | 438                            | 547                                       |
| OECD     | Cattle & buffaloes | Grazing      | 3,178        | 2,740     | -     | 223           | -               | 105                                    | 38            | 57                   | -            | 28               | 223                            | 260                                       |
|          |                    | Mixed        | 2,898        | 2,244     | -     | 348           | -               | 101                                    | 62            | 111                  | -            | 58               | 348                            | 417                                       |
|          |                    | Feedlots*    | 2,022        | 481       | -     | 1,448         | -               | 27                                     | 37            | 22                   | -            | 24               | 1,448                          | 1,485                                     |
|          | Small Ruminants    | Grazing      | 297          | 267       | -     | 7             | -               | 12                                     | 1             | 9                    | -            | 8                | 7                              | 8                                         |
|          |                    | Mixed        | 301          | 261       | -     | 8             | -               | 17                                     | 1             | 14                   | -            | 12               | 8                              | 9                                         |
|          | Poultry            | Backyard     | 25           | -         | 5     | -             | 11              | 6                                      | -             | 2                    | -            | -                | -                              | -                                         |
|          |                    | Layers       | 27           | -         | -     | 18            | -               | -                                      | 3             | -                    | 3            | 2                | 21                             | 24                                        |
|          |                    | Broilers     | 40           | -         | -     | 26            | -               | -                                      | 8             | 2                    | 2            | 2                | 28                             | 36                                        |
|          | Pigs               | Backyard     | 574          | 187       | 64    | -             | 189             | 94                                     | 14            | 18                   | -            | 7                | -                              | 14                                        |
|          |                    | Intermediate | 583          | 42        | -     | 343           | -               | 69                                     | 67            | 33                   | 10           | 17               | 354                            | 421                                       |
|          |                    | Industrial   | 637          | -         | -     | 432           | -               | 30                                     | 93            | 49                   | 14           | 19               | 446                            | 539                                       |

\* Figures reported for fattening phase in feedlots (3 to 6 months). DM = dry matter. Roughages = fresh grass, hay, silage, crop residues such as straws and sugar cane tops, tree leaves and fodder beet. Other oil seed cakes: rape, canola, cotton and palm kernel. Other edible: cassava pellets, beans and unprocessed soy beans, rapeseed and soy oil. Other non-edible: corn gluten feed and meal, pulp, molasses, fish meal, synthetic amino acids, lime. Cereal grains = grains from wheat, maize, barley, millet, rice, sorghum, oat, buckwheat and fonio. In competition with food production: edible + soybean cakes

Table SI 4. Dairy cattle feed rations, regional averages

| Feed component                      | NA                                    | RUSS | WE   | EE   | NENA | ESEA | OC   | SA   | LAC  | SSA  |
|-------------------------------------|---------------------------------------|------|------|------|------|------|------|------|------|------|
|                                     | Percentage of total dry matter intake |      |      |      |      |      |      |      |      |      |
| <b>Roughages</b>                    |                                       |      |      |      |      |      |      |      |      |      |
| Fresh grass                         | 14.4                                  | 23.8 | 33.2 | 22.5 | 41.4 | 22.4 | 68.3 | 10.7 | 54.9 | 56.8 |
| Hay                                 | 17.0                                  | 23.8 | 16.6 | 22.8 | 17.8 | 19.2 | 5.6  | 14.2 | 15.4 | 18.1 |
| Legumes and silage                  | 30.6                                  | 34.3 | 22.6 | 33.2 | 0.3  | 2.7  | 10.4 | -    | -    | -    |
| Crop residues                       | -                                     | 1.8  | 2.5  | 1.8  | 31.7 | 38.4 | -    | 60.1 | 8.7  | 17.0 |
| Sugarcane tops                      | -                                     | -    | -    | -    | 1.6  | 0.6  | -    | 3.5  | 2.6  | 1.9  |
| Leaves                              | -                                     | -    | -    | -    | 3.6  | 2.3  | -    | 6.1  | 6.5  | 3.0  |
| <b>By-products and concentrates</b> |                                       |      |      |      |      |      |      |      |      |      |
| Bran                                | 4.4                                   | 2.9  | 2.0  | 3.0  | 0.6  | 0.5  | 2.5  | 0.2  | 0.4  | 0.1  |
| Oilseed meals                       | 6.4                                   | 4.6  | 8.5  | 5.7  | 2.3  | 6.7  | 1.3  | 5.2  | 6.4  | 3.1  |
| Wet distilleries grain              | 4.3                                   | -    | -    | -    | -    | -    | -    | -    | -    | -    |
| Grains                              | 22.8                                  | 7.2  | 13.2 | 9.1  | 0.2  | 7.2  | 11.8 | -    | 4.9  | 0.1  |
| Molasses                            | -                                     | -    | 0.1  | -    | 0.5  | -    | -    | -    | 0.1  | 0.1  |
| Pulp                                | -                                     | 1.8  | 1.3  | 1.8  | -    | -    | -    | -    | -    | -    |

Table SI 5. Beef cattle feed rations, regional averages

| Feed component                      | NA                                    | RUSS | WE   | EE   | NENA | ESEA | OC   | SA   | LAC  | SSA  |
|-------------------------------------|---------------------------------------|------|------|------|------|------|------|------|------|------|
|                                     | Percentage of total dry matter intake |      |      |      |      |      |      |      |      |      |
| <b>Roughages</b>                    |                                       |      |      |      |      |      |      |      |      |      |
| Fresh grass                         | 35.2                                  | -    | 36.0 | 21.0 | 24.9 | 23.6 | 63.5 | 8.0  | 65.1 | 61.1 |
| Hay                                 | 39.4                                  | -    | 14.8 | 21.9 | 36.7 | 18.7 | 6.8  | 12.5 | 9.4  | 12.6 |
| Legumes and silage                  | 7.8                                   | -    | 23.1 | 32.3 | 2.1  | 0.7  | 10.7 | -    | -    | -    |
| Crop residues                       | -                                     | -    | 3.8  | 2.1  | 242  | 46.2 | -    | 68.0 | 10.2 | 19.4 |
| Sugarcane tops                      | -                                     | -    | -    | -    | 0.1  | 0.8  | -    | 3.6  | 2.5  | 3.7  |
| Leaves                              | -                                     | -    | -    | -    | 9.2  | 2.8  | -    | 5.9  | 4.1  | 1.6  |
| <b>By-products and concentrates</b> |                                       |      |      |      |      |      |      |      |      |      |
| Bran                                | 0.9                                   | -    | 1.7  | 3.5  | 0.3  | 0.2  | 3.8  | 0.1  | 0.1  | -    |
| Oilseed meals                       | 0.6                                   | -    | 7.6  | 6.6  | 1.9  | 2.7  | 1.5  | 1.9  | 3.9  | 1.4  |
| Wet distilleries grain              | 1.0                                   | -    | -    | -    | -    | -    | -    | -    | -    | -    |
| Grains                              | 15.1                                  | -    | 10.6 | 10.5 | 0.6  | 4.2  | 13.7 | -    | 4.7  | 0.1  |
| Molasses                            | -                                     | -    | 0.7  | -    | -    | -    | -    | -    | -    | -    |
| Pulp                                | -                                     | -    | 1.7  | 2.1  | -    | -    | -    | -    | -    | -    |

Table SI 6. Dairy buffaloes feed rations, regional averages

| Feed component                      | NA                                    | RUSS | WE   | EE   | NENA | ESEA | OC | SA   | LAC  | SSA |
|-------------------------------------|---------------------------------------|------|------|------|------|------|----|------|------|-----|
|                                     | Percentage of total dry matter intake |      |      |      |      |      |    |      |      |     |
| <b>Roughages</b>                    |                                       |      |      |      |      |      |    |      |      |     |
| Fresh grass                         | -                                     | -    | 1.7  | 38.9 | 3.4  | 35.7 | -  | 5.2  | 65.3 | -   |
| Hay                                 | 15.6                                  | -    | 16.1 | 25.9 | 10.7 | 13.7 | -  | 20.1 | 12.2 | -   |
| Legumes and silage                  | 34.4                                  | -    | 33.7 | 17.3 | -    | -    | -  | -    | -    | -   |
| Crop residues                       | 5.2                                   | -    | 5.0  | -    | 72.8 | 39.5 | -  | 54.8 | 8.4  | -   |
| Sugarcane tops                      | -                                     | -    | -    | -    | 5.8  | 2.2  | -  | 4.7  | 2.2  | -   |
| Leaves                              | -                                     | -    | -    | -    | 4.0  | 2.3  | -  | 8.1  | 5.2  | -   |
| <b>By-products and concentrates</b> |                                       |      |      |      |      |      |    |      |      |     |
| Bran                                | 4.7                                   | -    | 0.8  | 4.6  | 1.6  | 3.3  | -  | 3.6  | 3.4  | -   |
| Oilseed meals                       | 10.9                                  | -    | 11.5 | 5.2  | 1.6  | 3.3  | -  | 3.6  | 3.4  | -   |
| Wet distilleries grain              | 7.3                                   | -    | 7.0  | -    | -    | -    | -  | -    | -    | -   |
| Grains                              | 15.6                                  | -    | 18.2 | 8.1  | -    | -    | -  | -    | -    | -   |
| Molasses                            | -                                     | -    | -    | -    | -    | -    | -  | -    | -    | -   |
| Pulp                                | 6.2                                   | -    | 6.0  | -    | -    | -    | -  | -    | -    | -   |



Table SI 7. Meat buffaloes feed rations, regional averages

| Feed component                        | NA | RUSS | WE | EE | NENA | ESEA | OC | SA   | LAC  | SSA |
|---------------------------------------|----|------|----|----|------|------|----|------|------|-----|
| Percentage of total dry matter intake |    |      |    |    |      |      |    |      |      |     |
| <b>Roughages</b>                      |    |      |    |    |      |      |    |      |      |     |
| Fresh grass                           | -  | 41.1 | -  | -  | 38.9 | 37.8 |    | 5.9  | 68.0 | -   |
| Hay                                   | -  | 27.4 | -  | -  | 27.7 | 12.0 |    | 19.8 | 13.2 | -   |
| Legumes and silage                    | -  | 18.3 | -  | -  | -    | -    |    | -    | -    | -   |
| Crop residues                         | -  | -    | -  | -  | 29.8 | 43.5 |    | 60.1 | 8.9  | -   |
| Sugarcane tops                        | -  | -    | -  | -  | -    | 2.1  |    | 4.7  | 2.3  | -   |
| Leaves                                | -  | -    | -  | -  | 2.2  | 2.5  |    | 7.5  | 5.3  | -   |
| <b>By-products and concentrates</b>   |    |      |    |    |      |      |    |      |      |     |
| Bran                                  | -  | 4.7  | -  | -  | 0.7  | 1.1  |    | 1.0  | 1.1  | -   |
| Oilseed meals                         | -  | 3.3  | -  | -  | 0.7  | 1.1  |    | 1.0  | 1.1  | -   |
| Wet distilleries grain                | -  | -    | -  | -  | -    | -    |    | -    | -    | -   |
| Grains                                | -  | 5.2  | -  | -  | -    | -    |    | -    | -    | -   |
| Molasses                              | -  | -    | -  | -  | -    | -    |    | -    | -    | -   |
| Pulp                                  | -  | -    | -  | -  | -    | -    |    | -    | -    | -   |

Table SI 8. Dairy small ruminant feed rations, regional averages

| Feed component                        | NA   | RUSS | WE   | EE   | NENA | ESEA | OC   | SA   | LAC  | SSA  |
|---------------------------------------|------|------|------|------|------|------|------|------|------|------|
| Percentage of total dry matter intake |      |      |      |      |      |      |      |      |      |      |
| <b>Roughages</b>                      |      |      |      |      |      |      |      |      |      |      |
| Fresh grass                           | 29.7 | 32.0 | 24.9 | 32.5 | 46.4 | 23.0 | 62.2 | 23.9 | 74.9 | 58.8 |
| Hay                                   | 37.5 | 24.6 | 19.3 | 25.0 | 7.0  | 33.8 | 6.9  | 6.3  | 11.9 | 4.9  |
| Legumes and silage                    | 2.6  | 9.8  | 6.6  | 10.0 | 0.7  | -    | 7.8  | -    | -    | -    |
| Crop residues                         | -    | 11.5 | 16.4 | 11.8 | 38.4 | 26.9 | 1.1  | 53.9 | 8.7  | 31.1 |
| Sugarcane tops                        | -    | -    | -    | -    | 2.2  | 0.3  | -    | 2.3  | 2.1  | 3.9  |
| Leaves                                | -    | -    | -    | -    | 0.9  | 2.1  | -    | 1.6  | 0.3  | 0.2  |
| <b>By-products and concentrates</b>   |      |      |      |      |      |      |      |      |      |      |
| Bran                                  | 5.8  | 8.6  | 11.3 | 8.2  | 2.1  | 6.9  | 9.8  | 6.0  | 1.0  | 0.6  |
| Oilseed meals                         | 2.1  | 2.3  | 4.3  | 2.1  | 1.7  | 6.9  | 0.6  | 6.0  | 1.0  | 0.6  |
| Wet distilleries grain                | -    | -    | -    | -    | -    | -    | -    | -    | -    | -    |
| Grains                                | 17.2 | 3.6  | 5.4  | 3.3  | 0.2  | -    | 5.5  | -    | -    | -    |
| Molasses                              | 0.2  | -    | 0.7  | -    | -    | -    | -    | -    | -    | -    |
| Pulp                                  | 4.9  | 7.6  | 11.1 | 7.2  | 0.3  | -    | 6.1  | -    | -    | -    |

Table SI 9. Meat small ruminant feed rations, regional averages

| Feed component                        | NA   | RUSS | WE   | EE   | NENA | ESEA | OC   | SA   | LAC  | SSA  |
|---------------------------------------|------|------|------|------|------|------|------|------|------|------|
| Percentage of total dry matter intake |      |      |      |      |      |      |      |      |      |      |
| <b>Roughages</b>                      |      |      |      |      |      |      |      |      |      |      |
| Fresh grass                           | 34.8 | 38.2 | 45.4 | 37.0 | 34.9 | 19.7 | 75.4 | 25.7 | 68.9 | 57.9 |
| Hay                                   | 44.0 | 29.4 | 21.6 | 29.0 | 22.2 | 32.6 | 7.5  | 6.6  | 18.8 | 8.8  |
| Legumes and silage                    | 3.0  | 11.8 | 9.7  | 12.0 | 0.6  | -    | 9.3  | -    | -    | -    |
| Crop residues                         | -    | 13.7 | 13.0 | 13.9 | 37.4 | 39.2 | 1.2  | 55.9 | 9.9  | 27.9 |
| Sugarcane tops                        | -    | -    | -    | -    | 1.8  | 0.3  | -    | 4.2  | 1.4  | 5.2  |
| Leaves                                | -    | -    | -    | -    | 2.2  | 1.5  | -    | 1.7  | 0.2  | 0.2  |
| <b>By-products and concentrates</b>   |      |      |      |      |      |      |      |      |      |      |
| Bran                                  | 0.2  | -3.6 | 2.8  | 4.3  | 0.5  | 3.3  | 4.7  | 3.0  | 0.4  | -    |
| Oilseed meals                         | 0.5  | -0.2 | 2.2  | 0.3  | 0.3  | 3.3  | 0.1  | 3.0  | 0.4  | -    |
| Wet distilleries grain                | -    | -    | -    | -    | -    | -    | -    | -    | -    | -    |
| Grains                                | 17.3 | -0.4 | 0.7  | 0.5  | -    | -    | 0.9  | -    | -    | -    |
| Molasses                              | 0.2  | -    | 1.3  | -    | -    | -    | -    | -    | -    | -    |
| Pulp                                  | -    | -2.6 | 3.4  | 3.1  | -    | -    | 1.0  | -    | -    | -    |

Table SI 10. Industrial pig feed rations, regional averages

| Feed component                                  | NA | RUSS | WE | EE | NENA | ESEA | OC | SA | LAC | SSA    |
|-------------------------------------------------|----|------|----|----|------|------|----|----|-----|--------|
| Percentage of total dry matter intake           |    |      |    |    |      |      |    |    |     |        |
| <b>Food crops</b>                               |    |      |    |    |      |      |    |    |     |        |
| Pulses (non-local)                              | -  | -    | 3  | -  | -    | -    | -  | -  | -   | (-)-   |
| Cassava (non-local)                             | -  | -    | -  | -  | -    | 1    | -  | 2  | 1   | 11(4)  |
| Wheat (non-local)                               | 10 | 34   | 26 | 27 | -    | 4    | 20 | -  | 12  | (-)-   |
| Maize (non-local)                               | 54 | 20   | 13 | 28 | -    | 55   | -  | 12 | 50  | 18(2)  |
| Barley (non-local)                              | 17 | 10   | 22 | 9  | -    | 3    | 16 | -  | -   | (-)-   |
| Millet (non-local)                              | -  | -    | -  | -  | -    | -    | -  | -  | -   | 10(1)  |
| Rice (non-local)                                | -  | -    | -  | -  | -    | 3    | -  | 23 | 1   | 5(1)   |
| Sorghum (non-local)                             | -  | -    | -  | -  | -    | 1    | 43 | 22 | 11  | 19(1)  |
| Soybean (non-local)                             | -  | -    | -  | -  | -    | 4    | -  | 1  | 2   | (-)-   |
| <b>By-products and concentrates</b>             |    |      |    |    |      |      |    |    |     |        |
| Soybean meal (non-local)                        | 11 | 15   | 16 | 15 | -    | 17   | 19 | 21 | 19  | 6(1)   |
| Oilseed meal (non-local)                        | 1  | 10   | 11 | 10 | -    | -    | -  | -  | -   | (-)(5) |
| Cottonseed meal (non-local)                     | -  | -    | -  | -  | -    | -    | -  | 9  | -   | (-)(1) |
| Dry by-product grain industries (non-local)     | 4  | 5    | 5  | 6  | -    | 9    | -  | 5  | 1   | (-)(3) |
| Molasses (non-local)                            | -  | -    | 2  | -  | -    | -    | -  | -  | 1   | 1(-)   |
| Fishmeal (non-local)                            | 1  | 4    | -  | 3  | -    | 1    | -  | 4  | 1   | 3(-)   |
| Complements (amino acids, minerals) (non-local) | 2  | 2    | 2  | 2  | -    | 2    | 2  | 2  | 2   | 2(-)   |

Table SI 11. Backyard pig feed rations, regional averages

| Feed component                          | NA | RUSS | WE | EE | NENA | ESEA | OC | SA | LAC | SSA |
|-----------------------------------------|----|------|----|----|------|------|----|----|-----|-----|
| Percentage of total dry matter intake   |    |      |    |    |      |      |    |    |     |     |
| <b>Swill</b>                            | -  | 20   | -  | 19 | -    | 20   | -  | -  | 19  | 19  |
| <b>Roughages and crop residues</b>      |    |      |    |    |      |      |    |    |     |     |
| Pulses straw (local)                    | -  | 5    | -  | 7  | -    | 2    | -  | -  | 1   | 14  |
| Sugarcane tops (local)                  | -  | -    | -  | 1  | -    | 5    | -  | -  | 27  | 6   |
| Banana residues (local)                 | -  | -    | -  | -  | -    | -    | -  | -  | 4   | 2   |
| <b>Food crops</b>                       |    |      |    |    |      |      |    |    |     |     |
| Pulses (local)                          | -  | 1    | -  | 1  | -    | -    | -  | -  | -   | 2   |
| Cassava (local)                         | -  | -    | -  | -  | -    | -    | -  | -  | 1   | 7   |
| Wheat (local)                           | -  | 18   | -  | 12 | -    | 6    | -  | -  | 1   | -   |
| Maize (local)                           | -  | 1    | -  | 7  | -    | 7    | -  | -  | 5   | 8   |
| Barley (local)                          | -  | 7    | -  | 5  | -    | -    | -  | -  | -   | -   |
| Millet (local)                          | -  | -    | -  | -  | -    | -    | -  | -  | -   | 2   |
| Rice (local)                            | -  | -    | -  | -  | -    | 17   | -  | -  | 2   | 3   |
| Sorghum (local)                         | -  | -    | -  | -  | -    | -    | -  | -  | 1   | 3   |
| Soybean (local)                         | -  | -    | -  | -  | -    | 1    | -  | -  | 2   | -   |
| Banana (local)                          | -  | -    | -  | -  | -    | -    | -  | -  | 1   | 2   |
| <b>By-products and concentrates</b>     |    |      |    |    |      |      |    |    |     |     |
| Soybean meal (local)                    | -  | 1    | -  | 1  | -    | 8    | -  | -  | 15  | 1   |
| Oilseed meal (local)                    | -  | 13   | -  | 17 | -    | 8    | -  | -  | 5   | 9   |
| Oilseed meal (non-local)                | -  | 10   | -  | 8  | -    | 5    | -  | -  | 5   | 2   |
| Cottonseed meal (local)                 | -  | -    | -  | -  | -    | 1    | -  | -  | 1   | 3   |
| Cottonseed meal (non-local)             | -  | 10   | -  | 8  | -    | 5    | -  | -  | 5   | 2   |
| Dry by-product grain industries (local) | -  | 13   | -  | 12 | -    | 15   | -  | -  | 5   | 8   |

Table SI 12. Intermediate pig feed rations, regional averages

| Feed component                                  | NA                                    | RUSS | WE | EE | NENA | ESEA | OC | SA | LAC | SSA |
|-------------------------------------------------|---------------------------------------|------|----|----|------|------|----|----|-----|-----|
|                                                 | Percentage of total dry matter intake |      |    |    |      |      |    |    |     |     |
| <b>Swill</b>                                    | -                                     | -    | -  | -  | -    | 4    | -  | -  | 1   | 3   |
| <b>Roughages and crop residues</b>              |                                       |      |    |    |      |      |    |    |     |     |
| Pulses straw (local)                            | -                                     | 2    | 2  | 2  | -    | 1    | -  | 7  | 1   | 9   |
| Sugarcane tops (local)                          | -                                     | -    | -  | -  | -    | 4    | -  | 10 | 18  | 2   |
| Banana residues (local)                         | -                                     | -    | -  | -  | -    | -    | -  | 2  | 3   | 4   |
| <b>Food crops</b>                               |                                       |      |    |    |      |      |    |    |     |     |
| Pulses (local)                                  | -                                     | -    | -  | -  | -    | -    | -  | 1  | -   | 1   |
| Pulses (non-local)                              | -                                     | -    | 2  | -  | -    | -    | -  | -  | -   | -   |
| Cassava (local)                                 | -                                     | -    | -  | -  | -    | -    | -  | -  | -   | 7   |
| Cassava (non-local)                             | -                                     | -    | -  | -  | -    | 1    | -  | 1  | 1   | 7   |
| Wheat (local)                                   | -                                     | 9    | 11 | 9  | -    | 3    | -  | 3  | 1   | -   |
| Wheat (non-local)                               | -                                     | 24   | 8  | 21 | -    | 2    | -  | -  | 8   | -   |
| Maize (local)                                   | -                                     | -    | 10 | 2  | -    | 4    | -  | 2  | 5   | 4   |
| Maize (non-local)                               | -                                     | 14   | 12 | 17 | -    | 25   | -  | 6  | 18  | 12  |
| Barley (local)                                  | -                                     | 4    | 6  | 3  | -    | -    | -  | -  | -   | -   |
| Barley (non-local)                              | -                                     | 7    | 7  | 6  | -    | 2    | -  | -  | -   | -   |
| Millet (local)                                  | -                                     | -    | -  | -  | -    | -    | -  | 1  | -   | 1   |
| Millet (non-local)                              | -                                     | -    | -  | -  | -    | -    | -  | -  | -   | 7   |
| Rice (local)                                    | -                                     | -    | -  | -  | -    | 12   | -  | 8  | 1   | 2   |
| Rice (non-local)                                | -                                     | -    | -  | -  | -    | 3    | -  | 12 | 1   | 3   |
| Sorghum (local)                                 | -                                     | -    | -  | -  | -    | -    | -  | -  | 1   | 2   |
| Sorghum (non-local)                             | -                                     | -    | -  | -  | -    | -    | -  | 11 | 4   | 10  |
| Soybean (local)                                 | -                                     | -    | -  | -  | -    | 1    | -  | -  | 1   | -   |
| Soybean (non-local)                             | -                                     | -    | -  | -  | -    | 2    | -  | -  | 3   | -   |
| Banana                                          | -                                     | -    | -  | -  | -    | -    | -  | 1  | 1   | 1   |
| <b>By-products and concentrates</b>             |                                       |      |    |    |      |      |    |    |     |     |
| Soybean meal (local)                            | -                                     | 1    | 2  | -  | -    | 4    | -  | 1  | 9   | 1   |
| Soybean meal (non-local)                        | -                                     | 10   | 10 | 10 | -    | 8    | -  | 10 | 10  | 3   |
| Oilseed meal (local)                            | -                                     | 6    | 5  | 7  | -    | 6    | -  | 6  | 4   | 8   |
| Oilseed meal (non-local)                        | -                                     | 7    | 5  | 7  | -    | -    | -  | -  | -   | -   |
| Cottonseed meal (local)                         | -                                     | -    | -  | -  | -    | 1    | -  | 1  | 1   | 2   |
| Cottonseed meal (non-local)                     | -                                     | -    | -  | -  | -    | -    | -  | 4  | -   | -   |
| Dry by-product grain industries (local)         | -                                     | 7    | 13 | 7  | -    | 10   | -  | 7  | 4   | 5   |
| Dry by-product grain industries (non-local)     | -                                     | 4    | 3  | 4  | -    | 4    | -  | 2  | 1   | -   |
| Molasses (non-local)                            | -                                     | -    | 2  | -  | -    | -    | -  | -  | -   | 1   |
| Fishmeal (non-local)                            | -                                     | 3    | -  | 2  | -    | 1    | -  | 2  | 1   | 2   |
| Complements (amino acids, minerals) (non-local) | -                                     | 1    | 1  | 1  | -    | 1    | -  | 1  | 1   | 1   |

Table SI 13. Backyard chicken feed rations, regional averages

| Feed component                          | NA                                    | RUSS | WE | EE | NENA | ESEA | OC | SA | LAC | SSA |
|-----------------------------------------|---------------------------------------|------|----|----|------|------|----|----|-----|-----|
|                                         | Percentage of total dry matter intake |      |    |    |      |      |    |    |     |     |
| <b>Swill</b>                            | -                                     | 20   | 20 | 20 | 40   | 40   | -  | 40 | 40  | 40  |
| <b>Food crops</b>                       |                                       |      |    |    |      |      |    |    |     |     |
| Pulses (local)                          | -                                     | 1    | -  | 1  | 1    | 1    | -  | 1  | -   | 2   |
| Cassava (local)                         | -                                     | -    | -  | -  | -    | 3    | -  | -  | 2   | 8   |
| Wheat (local)                           | -                                     | 27   | 17 | 16 | 15   | 5    | -  | 12 | 1   | 1   |
| Maize (local)                           | -                                     | 1    | 23 | 11 | 2    | -    | -  | 2  | 7   | 11  |
| Barley (local)                          | -                                     | 10   | 4  | 6  | 4    | -    | -  | 2  | -   | -   |
| Millet (local)                          | -                                     | 1    | -  | -  | -    | -    | -  | -  | -   | 3   |
| Rice (local)                            | -                                     | -    | -  | -  | 1    | 14   | -  | 14 | 6   | 3   |
| Sorghum (local)                         | -                                     | -    | -  | -  | 3    | 1    | -  | -  | 1   | 3   |
| Soybean (local)                         | -                                     | -    | 1  | -  | -    | 1    | -  | -  | 3   | -   |
| <b>By-products and concentrates</b>     |                                       |      |    |    |      |      |    |    |     |     |
| Soybean meal (local)                    | -                                     | 2    | 4  | 1  | -    | 5    | -  | 2  | 20  | 2   |
| Oilseed meal (local)                    | -                                     | 19   | 8  | 26 | 18   | 18   | -  | 6  | 12  | 11  |
| Cottonseed meal (local)                 | -                                     | -    | -  | -  | 3    | 1    | -  | 5  | 2   | 6   |
| Dry by-product grain industries (local) | -                                     | 19   | 22 | 17 | 13   | 11   | -  | 15 | 7   | 11  |

Table SI 14. Layer chicken feed rations, regional averages

| Feed component                              | NA                                    | RUSS | WE | EE | NENA | ESEA | OC | SA | LAC | SSA |
|---------------------------------------------|---------------------------------------|------|----|----|------|------|----|----|-----|-----|
|                                             | Percentage of total dry matter intake |      |    |    |      |      |    |    |     |     |
| Food crops                                  |                                       |      |    |    |      |      |    |    |     |     |
| Wheat (non-local)                           | 2                                     | 52   | 44 | 48 | 22   | 3    | 32 | 30 | 4   | 7   |
| Maize (non-local)                           | 65                                    | -    | 22 | 9  | 42   | 57   | 10 | 27 | 29  | 59  |
| Barley (non-local)                          | -                                     | 30   | -  | 16 | -    | -    | -  | -  | -   | -   |
| Sorghum (non-local)                         | -                                     | -    | -  | -  | -    | -    | 21 | -  | 37  | -   |
| Soybean (non-local)                         | 2                                     | -    | 19 | 2  | 15   | 18   | 4  | -  | 3   | 3   |
| By-products and concentrates                |                                       |      |    |    |      |      |    |    |     |     |
| Soybean meal (non-local)                    | 22                                    | -    | 1  | 3  | 4    | 3    | 2  | 8  | 14  | 14  |
| Oilseed meal (non-local)                    | -                                     | 8    | -  | 5  | 2    | 3    | 9  | 9  | 5   | 9   |
| Dry by-product grain industries (non-local) | -                                     | -    | 1  | -  | -    | 5    | -  | 8  | -   | -   |
| Rapeseed (non-local)                        | -                                     | -    | 4  | 7  | 7    | 1    | 8  | -  | -   | -   |
| Fishmeal (non-local)                        | -                                     | 2    | -  | 2  | -    | -    | 5  | 10 | -   | -   |
| Complements (amino acids, minerals)         | 1                                     | 1    | 1  | 1  | 1    | 1    | 1  | 1  | 1   | 1   |
| Limestone                                   | 8                                     | 7    | 8  | 7  | 7    | 8    | 7  | 6  | 7   | 7   |

Table SI 15. Broiler chicken feed rations, regional averages

| Feed component                      | NA                                    | RUSS | WE | EE | NENA | ESEA | OC | SA | LAC | SSA |
|-------------------------------------|---------------------------------------|------|----|----|------|------|----|----|-----|-----|
|                                     | Percentage of total dry matter intake |      |    |    |      |      |    |    |     |     |
| Food crops                          |                                       |      |    |    |      |      |    |    |     |     |
| Wheat (non-local)                   | -                                     | 38   | 40 | 39 | 16   | 13   | 33 | 18 | -   | 6   |
| Maize (non-local)                   | 62                                    | 30   | 24 | 28 | 44   | 47   | 5  | 38 | 70  | 64  |
| Barley (non-local)                  | -                                     | -    | -  | -  | 7    | 4    | 7  | 5  | -   | -   |
| Sorghum (non-local)                 | -                                     | -    | 5  | -  | 7    | 7    | 21 | 9  | -   | -   |
| Soybean (non-local)                 | 2                                     | 25   | 15 | 25 | -    | -    | 3  | -  | -   | -   |
| By-products and concentrates        |                                       |      |    |    |      |      |    |    |     |     |
| Soybean meal (non-local)            | 24                                    | -    | 10 | -  | 25   | 25   | 16 | 24 | 28  | 28  |
| Oilseed meal (non-local)            | 5                                     | 5    | 2  | 6  | 2    | 1    | 2  | 2  | -   | -   |
| Rapeseed (non-local)                | -                                     | -    | 1  | -  | -    | -    | 1  | -  | -   | -   |
| Rapeseed meal (non-local)           | -                                     | -    | 1  | -  | -    | -    | 4  | -  | -   | -   |
| Fishmeal (non-local)                | 5                                     | -    | -  | -  | 2    | 1    | 5  | 2  | -   | -   |
| Complements (amino acids, minerals) | 1                                     | 1    | 1  | 1  | 1    | 1    | 1  | 1  | 1   | 1   |
| Limestone                           | 1                                     | 1    | 1  | 1  | 1    | 1    | 2  | 1  | 1   | 1   |

## 5. Allocation method for land-use to different co-products

When different co-products are produced from one crop (e.g. grain and straw, oil and oil seed cakes), an allocation method was used to determine the share of land attributable to each material. The method is based on the approach developed by Gerber et al. (2013) for the calculation of greenhouse gas emissions. It relies on the relative mass fraction and value of the different co-products and by-products. Digestibility was used as a proxy of value and the mass fraction reflects the weight of different parts of the plant in dry matter.

The formula used to calculate land-use for feed components is the following:

$$LU = \frac{1}{DMYG_{crop} * FUF} * \frac{EFA}{MFA}$$

where LU is the land-use in ha,  $DMYG_{crop}$  is the dry matter yield of the feed component in kg/ha, FUF is the Feed Use Fraction, EFA is the economic fraction allocation and MFA is the Mass fraction allocation.

In the case the feed component is a crop residue, such as straws, the formula used to calculate land-use is the following:

$$LU = \frac{1}{DMYG_{crop\ residue} * FUF + DMYG_{crop}} * \frac{EFA}{MFA}$$

where LU is the land-use in ha,  $DMYG_{crop\ residue}$  is the dry matter yield of the feed component in kg/ha (calculated following IPCC 2006 Table 11.2),  $DMYG_{crop}$  is the dry matter yield of the relative crop in kg/ha, FUF is the feed use fraction, EFA is the economic fraction allocation and MFA is the Mass fraction allocation. Values of the different factors are presented in Table SI 16.

Table SI 16. Sources and values of the factors used for the calculation of land used to produce the different feed materials

| Feed material                                     | Source for Dry Matter Yield (DMY)             | Feed Use Fraction (FUF) | Mass Fraction Allocation (MFA) | Economic Fraction Allocation (EFA) |
|---------------------------------------------------|-----------------------------------------------|-------------------------|--------------------------------|------------------------------------|
| <b>Grass and legume grass, fresh and dry</b>      | Net Primary Productivity (Haberl et al. 2007) | 0.53*                   | 1                              | 1                                  |
| <b>Cereal straws and sugar cane tops</b>          | Based on IPCC (2006)                          | 0.73**                  | Formula 1                      | Formula 2                          |
| <b>Silages</b>                                    | GAEZ and IPCC (2006)                          | 1                       | 1                              | 1                                  |
| <b>Tree leaves</b>                                | Authors' own assumptions                      | 1                       | 1                              | 1                                  |
| <b>Fodder beet</b>                                | GAEZ                                          | 1                       | 1                              | 1                                  |
| <b>Cereal grains</b>                              | GAEZ                                          | 1                       | 1                              | 1                                  |
| <b>Soybean cakes</b>                              | GAEZ                                          | 1                       | 0.80                           | 0.72                               |
| <b>Rapeseed cakes</b>                             | GAEZ                                          | 1                       | 0.58                           | 0.28                               |
| <b>Cotton seed cakes</b>                          | GAEZ                                          | 1                       | 0.45                           | 0.23*                              |
| <b>Other oil seed cakes</b>                       | GAEZ                                          | 1                       | 0.58                           | 0.28                               |
| <b>Palm kernel expeller</b>                       | GAEZ                                          | 1                       | 0.03                           | 0.01                               |
| <b>Corn gluten meal</b>                           | GAEZ                                          | 1                       | 0.05                           | 0.10                               |
| <b>Corn gluten feed</b>                           | GAEZ                                          | 1                       | 0.21                           | 0.06                               |
| <b>Sugar beet pulp</b>                            | GAEZ                                          | 1                       | 0.19                           | 0.11                               |
| <b>Molasses</b>                                   | GAEZ                                          | 1                       | 0.13                           | 0.06                               |
| <b>Brans and cereals middling</b>                 | GAEZ                                          | 1                       | 0.17                           | 0.04                               |
| <b>Spent distiller, breweries, biofuel grains</b> | GAEZ                                          | 1                       | 1                              | 0.08                               |
| <b>Swill</b>                                      | Authors' own assumptions                      | 1                       | 1                              | 1                                  |
| <b>Pulses</b>                                     | GAEZ                                          | 1                       | Formula 3                      | Formula 4                          |
| <b>Pulses straw</b>                               | GAEZ                                          | 0.90                    | Formula 1                      | Formula 2                          |
| <b>Cassava</b>                                    | GAEZ                                          | 1                       | 1                              | 1                                  |
| <b>Rapeseed</b>                                   | GAEZ                                          | 1                       | 1                              | 1                                  |
| <b>Soybeans</b>                                   | GAEZ                                          | 1                       | 1                              | 1                                  |
| <b>Soy oil</b>                                    | GAEZ                                          | 1                       | 0.17                           | 0.27                               |
| <b>Banana fruits</b>                              | GAEZ                                          | 1                       | Formula 3                      | Formula 4                          |
| <b>Banana stems</b>                               | GAEZ                                          | 0.50                    | Formula 1                      | Formula 2                          |
| <b>Fishmeal</b>                                   | Authors' own assumptions                      | 1                       | 1                              | 1                                  |
| <b>Synthetic amino acids and lime</b>             | Authors' own assumptions                      | 1                       | 1                              | 1                                  |

\*Average value reported (the original values are region and system specific). \*\*Average value reported (the original values are region specific). DE = digestible energy

$$\text{Formula 1: } MFA = \frac{DMY_{crop\ residue} * FUF}{DMY_{crop\ residue} * FUF + DMY_{crop}} \quad \text{Formula 2: } EFA = \frac{DMY_{crop\ residue} * FUF * DE_{crop\ residue}}{DMY_{crop\ residue} * FUF * DE_{crop\ residue} + DMY_{crop} * DE_{crop}}$$

$$\text{Formula 3: } MFA = \frac{DMY_{crop} * FUF}{DMY_{crop\ residue} * FUF + DMY_{crop}} \quad \text{Formula 4: } EFA = \frac{DMY_{crop} * FUF * DE_{crop}}{DMY_{crop\ residue} * FUF * DE_{crop\ residue} + DMY_{crop} * DE_{crop}}$$

## 6. Projections of sector's trends

The OECD-FAO Agricultural Outlook for 2016-2025 (OECD/FAO, 2016) was used to analyse future trends in the livestock sector and their implications for feed demand and land-use, as compared to the reference year 2010. Conservative FCR improvements (0 to 5% lower depending on the species), and more optimistic improvements (5 to 15% lower FCR) were considered derived from Wirsenius et al. (2010). Yields on grasslands were considered constant between 2010 and 2025.

Table SI 17. Projected meat production and crop yields by 2025 (OECD/FAO, 2016) and related animal feed demand and area needed: range, lower bound corresponding to optimistic improvement in FCR and upper bound to conservative improvement in FCR

|                       |                    | Meat<br>production<br>2010<br>(Mt cwe) | Meat<br>production<br>2025/2010<br>(%) | Range of<br>FCR<br>improve-<br>ment<br>(%) | Crop yields<br>2025/2010<br>(%) | Human-<br>edible feed<br>intake 2010<br>(Mt DM) | Non-human-<br>edible feed<br>intake 2010<br>(Mt DM) | Human-edible<br>feed intake<br>2025 (Mt DM) | Non-human-<br>edible feed<br>intake 2025<br>(Mt DM) | Area of<br>human -<br>edible feed<br>2025<br>(million ha) | Area of non-<br>human-<br>edible feed<br>2025<br>(million ha) |
|-----------------------|--------------------|----------------------------------------|----------------------------------------|--------------------------------------------|---------------------------------|-------------------------------------------------|-----------------------------------------------------|---------------------------------------------|-----------------------------------------------------|-----------------------------------------------------------|---------------------------------------------------------------|
| <b>Non OECD</b>       | Cattle & buffaloes | 46.3                                   | 21                                     | [5-15]                                     | 25                              | 124                                             | 3,387                                               | [131-143]                                   | [3,568-3,907]                                       | [36-39]                                                   | [1,069-1,171]                                                 |
|                       | Small Ruminants    | 11.6                                   | 33                                     | [5-15]                                     | 25                              | 2                                               | 451                                                 | [2.2-2.4]                                   | [523-573]                                           | [0.6-0.7]                                                 | [1,033-1,131]                                                 |
|                       | Poultry            | 71.8                                   | 32                                     | [5-10]                                     | 25                              | 263                                             | 170                                                 | [315-330]                                   | [203-213]                                           | [71-74]                                                   | [52-54]                                                       |
|                       | Pigs               | 92.8                                   | 19                                     | [5-10]                                     | 25                              | 103                                             | 279                                                 | [112-117]                                   | [304-318]                                           | [32-33]                                                   | [24-25]                                                       |
| <b>OECD</b>           | Cattle & buffaloes | 28.0                                   | 4                                      | [0-5]                                      | 10                              | 134                                             | 673                                                 | [133-140]                                   | [669-703]                                           | [28-30]                                                   | [138-145]                                                     |
|                       | Small Ruminants    | 2.5                                    | 15                                     | [0-5]                                      | 10                              | 5                                               | 73                                                  | [5.0-5.3]                                   | [80-84]                                             | [0.8-0.9]                                                 | [36-38]                                                       |
|                       | Poultry            | 41.3                                   | 24                                     | [0-5]                                      | 10                              | 118                                             | 47                                                  | [139-146]                                   | [55-58]                                             | [21-22]                                                   | [19-20]                                                       |
|                       | Pigs               | 39.8                                   | 10                                     | [0-5]                                      | 10                              | 114                                             | 53                                                  | [119-125]                                   | [56-58]                                             | [24-25]                                                   | [8.9-9.3]                                                     |
| <b>Total non OECD</b> |                    | 222.6                                  | 24                                     | -                                          | -                               | 492                                             | 4,287                                               | [560-593]                                   | [4,597-5,011]                                       | [139-148]                                                 | [2,178-2,381]                                                 |
| <b>Total OECD</b>     |                    | 111.5                                  | 14                                     | -                                          | -                               | 370                                             | 846                                                 | [396-416]                                   | [860-903]                                           | [74-77]                                                   | [202-212]                                                     |
| <b>Total World</b>    |                    | 334.1                                  | 21                                     | -                                          | -                               | 863                                             | 5,133                                               | [956-1,009]                                 | [5,457-5,914]                                       | [213-225]                                                 | [2,379-2,593]                                                 |

Mt = million tons

DM=dry matter

Cwe=carcass weight equivalent

FCR=Feed Conversion Ratio

## 7. Validation of feed ration by literature review

An extensive literature review was also carried out to validate GLEAM feed rations. 121 peer reviewed international and national publications presenting feed rations for combinations of species, systems and regions were analyzed and compared to GLEAM outputs. No significant discrepancies were identified and main feed components as well as their share in the total dry matter intake were confirmed. References used for the feed review are presented in Table SI 18 for each system.

Table SI 18: List of publications used for GLEAM feed rations validation

|                                                                                                                                                                                                                                                                                                                                                                                                                                                                                                                                                                                                                                                                                                                                                                                                                                                                                                       |                                                                                                                                                                                                                                                                                                                                                                                                                                                                                                                                                                                                                                                                                                                                                                                                                                                                                                                              |                                                                                                                                                                                                                                                                                                                                                                                                                                                                                                                                                                                                                                                                                                                                                                                                                                                                                                  |                                                                                                                                                                                                                                                                                                                                                                                                                                                                                                                                                                                                                                                                        |
|-------------------------------------------------------------------------------------------------------------------------------------------------------------------------------------------------------------------------------------------------------------------------------------------------------------------------------------------------------------------------------------------------------------------------------------------------------------------------------------------------------------------------------------------------------------------------------------------------------------------------------------------------------------------------------------------------------------------------------------------------------------------------------------------------------------------------------------------------------------------------------------------------------|------------------------------------------------------------------------------------------------------------------------------------------------------------------------------------------------------------------------------------------------------------------------------------------------------------------------------------------------------------------------------------------------------------------------------------------------------------------------------------------------------------------------------------------------------------------------------------------------------------------------------------------------------------------------------------------------------------------------------------------------------------------------------------------------------------------------------------------------------------------------------------------------------------------------------|--------------------------------------------------------------------------------------------------------------------------------------------------------------------------------------------------------------------------------------------------------------------------------------------------------------------------------------------------------------------------------------------------------------------------------------------------------------------------------------------------------------------------------------------------------------------------------------------------------------------------------------------------------------------------------------------------------------------------------------------------------------------------------------------------------------------------------------------------------------------------------------------------|------------------------------------------------------------------------------------------------------------------------------------------------------------------------------------------------------------------------------------------------------------------------------------------------------------------------------------------------------------------------------------------------------------------------------------------------------------------------------------------------------------------------------------------------------------------------------------------------------------------------------------------------------------------------|
| <b>LAC Dairy Cattle</b><br>Poncheki et al 2015<br>Chizzotti et al 2015<br>Angarita et al 2015<br>de Leis et al 2015<br><br><b>LAC Beef Cattle</b><br>Arias et al 2015<br>Picasso et al 2014<br>Newbold et al 2014<br>Hulshof et al 2015<br><br><b>LAC Small Ruminant Milk &amp; Meat</b><br>Genin et al 1994<br>de Vargas Junior 2014<br>Pfister & Malechek 1986<br>LAC Industrial Pigs<br>Moreira et al 2004<br>Pereyra et al 2008<br><br><b>LAC Broilers</b><br>Romero-Sanchez<br>Hamme & Machado Junior<br>Kebreab et al 2005<br><br><b>LAC Layers</b><br>Mohammed et al 2012<br><br><b>E &amp; SE Asia Dairy Cattle</b><br>Lou et al 2015<br>Bingsheng 2002<br>Oshita et al 2007<br>Zemmelink and Ibrahim 2000<br>Salgado et al 2013<br><br><b>E &amp; SE Asia Beef Cattle</b><br>Candra et al 2015<br>Ogino et al 2004<br>Cherdthong et al 2011a<br>Cherdthong et al 2011b<br>Wanaput et al 2012 | <b>E &amp; SE Asia Backyard Pigs</b><br>Bingsheng 2002<br>Nakai 2008<br>Peters 2004<br>Fang & Fuller 1998<br>Paris 2002<br>Loc et al 1997<br><br><b>E &amp; SE Asia Intermediate Pigs</b><br>Malavanh & Preston 2006<br>Bingsheng 2002<br>Lemke et al 2006<br>Kunavongkrit & Heard 2000<br>Jones 2002<br>Lemke et al 2007<br>Tu et al 2010<br>Huong Tra 2003<br>Peters et al 2005<br>Malavanh et al 2008<br>Lemke & Zarate 2008<br><br><b>E &amp; SE Asia Industrial Pigs</b><br>Vu et al 2010<br>Li et al 2000<br>Ly et al 2003<br>Thieu et al 2008<br><br><b>E &amp; SE Asia Broilers</b><br>Lou et al 2015<br>Minh & Ogle 2005<br>Lu et al 2014<br>Jin et al 2014<br>Srinongkote et al 2004<br><br><b>E &amp; SE Asia Layers</b><br>Lou et al 2015<br>Minh & Ogle 2005<br>Furusawa et al 2000<br><br><b>South Asia Dairy Cattle</b><br>Padmakumar et al 2015<br>York 2010<br>York 2010b<br>Huque 2014<br>Islam et al 2010 | <b>South Asia Backyard Pigs</b><br>Rahman et al 2008<br>Niraula et al 2015<br>Kokrajihar et al 2007<br>Hossain et al 2011<br><br><b>SSA Dairy &amp; Beef Cattle</b><br>Wafula et al 2015<br>Wondatir & Darntew 2015<br>Ngongoni et al 2006<br>Sidibe-Anago et al 2006<br>Rufino et al 2007<br>Khalili et al 1992<br>Varvikko and Khalili 1993<br><br><b>SSA Small Ruminant Milk &amp; Meat</b><br>Makembe & Ndlovu 1996<br>Greyling at al 2004<br>Okagbare et al 2004<br>Megersa et al 2013<br>Ayantunde et al 2014<br>Rey & Das 1997<br>Tuah<br>Bosman et al 1996<br>Nyamangara & Ndlovu 1995<br><br><b>SSA Backyard Pigs</b><br>Permin et al 1999<br>Nsoso et al 2006<br>Mutua et al 2012<br><br><b>LAC Dairy Buffalo</b><br>Gagliostro et al 2015<br>Franzolin et al 2012<br><br><b>SA Beef Cattle</b><br>Sahoo et al 2000<br>Akter & Khandaker 2010<br>Rahman 2009<br>Ghebrehiwet et al 1988 | <b>SA Dairy Buffalo</b><br>Ahmad et al 2014<br>Sarwar et al 2011<br>Zia-ul-Hassan et al 2011<br>Padmakumar et al 2015<br>York 2010<br>Touqir et al 2007<br>Islam 2013<br><br><b>SA Broiler Chicken</b><br>Roy et al 2010<br>Chacrabati et al 2013<br>Aktar et al 2011<br>Shariatmadari<br>Vadivel & Pugalenth 2010<br><br><b>SSA Industrial Pigs</b><br>Lekule & Kyvsgaard 2003<br>Amaefule et al 2006<br>Ndindana et al 2002<br>Ncube et al 2003<br>Fonunyan<br>Ilemobade & Balogun 1981<br>Manjeti et al 1996<br>Oddoye et al 2009<br><br><b>SSA Broiler Chicken</b><br>Ayssiwede et al 2010<br>Akanji 2015<br>Hassan et al 2003<br>Kana et al 2011<br>Agwunobi 1999 |
|-------------------------------------------------------------------------------------------------------------------------------------------------------------------------------------------------------------------------------------------------------------------------------------------------------------------------------------------------------------------------------------------------------------------------------------------------------------------------------------------------------------------------------------------------------------------------------------------------------------------------------------------------------------------------------------------------------------------------------------------------------------------------------------------------------------------------------------------------------------------------------------------------------|------------------------------------------------------------------------------------------------------------------------------------------------------------------------------------------------------------------------------------------------------------------------------------------------------------------------------------------------------------------------------------------------------------------------------------------------------------------------------------------------------------------------------------------------------------------------------------------------------------------------------------------------------------------------------------------------------------------------------------------------------------------------------------------------------------------------------------------------------------------------------------------------------------------------------|--------------------------------------------------------------------------------------------------------------------------------------------------------------------------------------------------------------------------------------------------------------------------------------------------------------------------------------------------------------------------------------------------------------------------------------------------------------------------------------------------------------------------------------------------------------------------------------------------------------------------------------------------------------------------------------------------------------------------------------------------------------------------------------------------------------------------------------------------------------------------------------------------|------------------------------------------------------------------------------------------------------------------------------------------------------------------------------------------------------------------------------------------------------------------------------------------------------------------------------------------------------------------------------------------------------------------------------------------------------------------------------------------------------------------------------------------------------------------------------------------------------------------------------------------------------------------------|



## 8. References of the Supplementary Information

- Agribenchmark, 2013. Feedlot analysis. CANFAX. Available at <http://www.canfax.ca/Samples/Feedlot%20COP%20Analysis.pdf>
- CEREOPA. 2011. Available at [www.feedbase.com](http://www.feedbase.com), accessed: 18.01.2011.
- FAO. 2001. Los credos locales en los sistemas tradicionales de producción. FAO, Rome.
- FAO. 2003. Poultry feed formulation and preparation good practice in poultry production in South Asia, by Prabakaran, R. FAO Animal Production and Health Paper No. 159. FAO, Rome.
- FAO. 2006. Livestock's long shadow – Environmental issues and options, by Steinfeld, H., Gerber, P., Wassenaar, T., Castel, V., Rosales, M. & de Haan, C. Rome, FAO.
- FAO. 2010. Review of the poultry meat sector in Kazakhstan: supply chain analysis and development options, by Willis, G. (Unpublished FAO report).
- FAOSTAT, 2015. FAO Statistical Database. Accessed 2015.
- Gerber, P. J., Steinfeld, H., Henderson, B., Mottet, A., Opio, C., Dijkman, J., Falcucci, A. & Tempio, G., 2013. Tackling climate change through livestock: a global assessment of emissions and mitigation opportunities. FAO, Rome.
- Grant Clark, O., Moehn, S., Edeogu, I., Price, J. & Leonard, J. 2005. Manipulation of dietary protein and nonstarch polysaccharide to control swine manure emissions. J. Environ. Qual., 34: 1461–1466.
- Hu, D. 2007. Investigation report on pork supply chains in Zizhong County, Sichuan Province. China Academy of Agricultural Sciences. (Unpublished manuscript).
- Haberl, H., Erb, K. H., Krausmann, F., Gaube, V., Bondeau, A., Plutzer, C., Gingrich, S., Lucht W. & Fischer-Kowalski M. 2007. Quantifying and mapping the global human appropriation of net primary production in Earth's terrestrial ecosystem. Proceedings of the National Academy of Sciences of the USA 104: 12942-12947.
- IIASA/FAO, 2012. Global Agro-ecological Zones (GAEZ v3.0). IIASA, Laxenburg, Austria and FAO, Rome, Italy.
- Jeroch, H. 2011. Recommendations for energy and nutrients of layers: a critical review, Lohmann Information, 46(2): 61–72.

Leinonen, I., Williams, A.G., Wiseman, J., Guy, J. & Kyriazakis, I. 2012a. Predicting the environmental impacts of chicken systems in the United Kingdom through a life-cycle assessment: broiler production systems. *Poultry Sci.*, 91(1): 8-25.

Leinonen, I., Williams, A.G., Wiseman, J., Guy, J. & Kyriazakis, I. 2012b. Predicting the environmental impacts of chicken systems in the United Kingdom through a life-cycle assessment: egg production systems. *Poultry Sci.*, 91(1): 26–40.

Nielsen, N., Jørgensen, M. & Bahrndorff, S. 2011. Greenhouse gas emission from the Danish broiler production estimated via LCA methodology. AgroTech/ Knowledge Centre for Agriculture. Aarhus, Denmark.

Ndindana, W., Dzama, K., Ndiweni, P.N.B., Maswaure, S.M. & Chimonyo, M. 2002. Digestibility of fibre diets and performance of growing Zimbabwean indigenous Mukota pigs and exotic Large White pigs fed maize based diets with graded levels of maize cobs. *Animal Feed Science and Technology*, 97: 199–208.

OECD/FAO, 2016. OECD-FAO Agricultural Outlook 2016-2025, OECD Publishing, Paris.

Pelletier, N. 2008. Environmental performance in the US broiler poultry sector. *Agricultural Systems*, 98: 67–73 .

Petri, A. & Lemme, A. 2007. Trends and latest issues in broiler diet formulation. *Lohmann Information*, 42 (2): 25–37.

Rabobank. 2008. Animal proteins: costs and commodities. Rabobank, Amsterdam.

Robinson, T.P., Wint, G.R.W., Conchedda, G., Van Boeckel, T.P., Ercoli, V., Palamara, E., et al. 2014. Mapping the Global Distribution of Livestock. *PLoS ONE* 9(5): e96084. doi:10.1371/journal.pone.0096084

Séré, C. & Steinfeld, H., 1996. World livestock production systems: current status, issues and trends. FAO Animal Production and Health Paper 127. FAO. Rome

Tra, H.T.H. 2003. Assessing input in pig production with special focus on feed resources and feeding management in demand and resource driven production systems in Son La Province, Vietnam, University of Hohenheim. (MA thesis).

Thiele H., and Pottgüter, R. 2008. Management recommendations for laying hens in deep litter, perchery and free range systems. *Lohmann Information*, 43(1):53–63.

van der Werf, H.M.G., Petit, J. & Sanders, J. 2005. The environmental impacts of the production of concentrated feed: the case of pig feed in Bretagne. *Agricultural System*, 83: 153–177.

Wiedemann, S.G. & McGahan, E.J. 2011. Environmental assessment of an egg production supply chain using life cycle assessment. Final project report. A report for the Australian Egg Corporation Limited.

Wiedemann, S.G., McGahan, E. & Poad, P. 2012. Using life cycle assessment to quantify the environmental impact of chicken meat production. Publication, No.12/029. Rural Industries Research and Development, Canberra.

Wirsenius, S., Azar, C., & Berndes, G., 2010. How much land is needed for global food production under scenarios of dietary changes and livestock productivity increases in 2030? *Agricultural systems*, 103(9), 621-638.

## **9. References from the literature review presented in Table SI 16**

Agwunobi, L.N. (1999) Performance of Broiler Chickens Fed Sweet Potato Meal (*Ipomoea batatas* L.) Diets. *Tropical animal health and production* 31, pp. 383–389.

Ahmad, S., Jabbar, M.A., Khalique, A., Shahzad, F., Ahmad, N., Fiaz, M. & Younas, U. (2014) EFFECT OF DIFFERENT LEVELS OF NDF ON VOLUNTARY FEED INTAKE , DRY MATTER DIGESTIBILITY AND NUTRIENTS UTILIZATION IN DRY NILI RAVI BUFFALOES. *The Journal of Animal and Plant Sciences* 24(6), pp. 1602–1605.

Akanji, A.M. (2015) Effect of processed bambara groundnuts and benne seeds on growth and organ morphology of broiler. *Bangladesh Journal of Animal Science* 44(1), pp. 26–32.

Aktar, M., Rashid, M., Azam, M.G., Howlider, M.A.R. & Hoque, M.A. (1994) Shrimp waste and marine waste as substitutes of fish meal in broiler diet. *Bangladesh Journal of Animal Science* 40(1-2), pp. 18–22.

Akter, A. & Khandaker, Z.H. (2010) TRIPLE SUPER PHOSPHATE AS A SOURCE OF PHOSPHORUS IN THE DIET OF GROWING BULL. *Bangladesh Journal of Animal Science* 39(1-2), pp. 89–96.

Amaefule, K.U., Okechukwu, S.O., Ukachukwu, S.N., Okoye, F.C. & Onwudike, C. (2006) Digestibility and nutrient utilization of pigs fed graded levels of brewers ' dried grain based diets. *Livestock Research for Rural Development* 18(1).

Angarita, E., Molina, I., Villegas, G., Mayorga, O., Chará, J. & Barahona, R. (2015) Quantitative analysis of rumen microbial populations by qPCR in heifers fed on *Leucaena leucocephala* in the Colombian Tropical Dry Forest. *Acta Scientiarum. Animal Sciences* 37(2), pp. 135–142.

Arias, R.A., Catrileo, A., Larraín, R., Vera, R., Velásquez, A. & Toneatti, M. (2015) Estimating enteric methane emissions from Chilean beef fattening systems using a mechanistic model. *Journal of Agricultural Science* 153, pp. 114–123.

Ayantunde, A.A. & Blummel, M. (2014) Price and quality of livestock feeds in suburban markets of West Africa ' s Sahel : Case study from Bamako , Mali. *Revue d' élevage et de médecine vétérinaire des pays tropicaux* 67(1), pp. 13–21.

Ayssiwede, S.B., Dieng, A., Chrysostome, C., Ossebi, W., Hornick, J.L. & Missohou, A. (2010) Digestibility and Metabolic Utilization and Nutritional Value of *Leucaena leucocephala* ( Lam .) Leaves Meal Incorporated in the Diets of Indigenous Senegal Chickens. *International Journal of Poultry Science* 9(8), pp. 767–776.

Bingsheng, K. (2002) PERSPECTIVES AND STRATEGIES FOR THE LIVESTOCK SECTOR IN CHINA OVER THE NEXT THREE DECADES.

Bosman, H.G., Ademosun, A.A. & Koper-limbourg, H.A.G. (1996) Goat feeding practices and options for improvement in six villages in southwestern Nigeria. *Small Ruminant Research* 19, pp. 201–211.

Candra, A.A., Sukaryana, Y. & Noviadi, R. (2015) PERFORMANCES OF SIMENTAL AND CROSSBREED ONGOLE IN FATTENING BEEF CATTLE USING CASSAVA WASTE. *Bangladesh Journal of Veterinary Medicine* 13(1), pp. 53–56.

Chacrabati, R., Chowdhury, R., Yesmin, S. & Sano, H. (2013) Comparison of broiler performance using Plantain ( *Plantago lanceolata* L .), Bio-Sel-E and commercial diet. *Bangladesh Journal of Animal Science* 42(2), pp. 123–130.

Cherdthong, A., Wanapat, M. & Wachirapakorn, C. (2011) Influence of urea – calcium mixtures as rumen slow-release feed on in vitro fermentation using a gas production technique. *Archives of Animal Nutrition* 65(3), pp. 242–254.

Cherdthong, A., Wanapat, M. & Wachirapakorn, C. (2011) Influence of urea calcium mixture supplementation on ruminal fermentation characteristics of beef cattle fed on concentrates containing high levels of cassava chips and rice straw. *Animal Feed Science and Technology* 163(1), pp. 43–51. Available at: <http://dx.doi.org/10.1016/j.anifeedsci.2010.10.003>.

Chizzotti, M.L., Machado, F.S., Valente, E.E.L., Pereira, L.G.R., Campos, M.M., Tomich, T.R., Coelho, S.G. & Ribas, M.N. (2015) Technical note : Validation of a system for monitoring individual feeding behavior and individual feed intake in dairy cattle. *Journal of Dairy Science* 98(5), pp. 3438–3442. Available at: <http://dx.doi.org/10.3168/jds.2014-8925>.

Degen, A.A. (2007) Sheep and goat milk in pastoral societies. *Small Ruminant Research* 68, pp. 7–19.

Deka, R., Thorpe, W., Lapar, M.L. & Kumar, A. (2007) *Kokrajhar's pig sub-sector : Current status, constraints and opportunities*.

Devendra, C. (1981) Potential of Sheep and Goats in Less Developed Countries. *Journal of Animal Science* 51(2), pp. 461–473.

Eiar, Z.W. & Ilri, E.D. (2015) *Assessment of livestock production system and feed resources availability in Hawassa Zuria district , Ethiopia FEAST survey report.*

Fang, C. & Fuller, F. (1998) *Feed-Grain Consumption by Traditional Pork-Producing Households in China.*

Fomunyam, R.T. Economic aspects of banana and plantain use in animal feeding: the Cameroon experience. In: *Roots, tubers, plantains and bananas in animal feeding.* p. 13.

Franzolin, R., St-pierre, B., Northwood, K. & Wright, A.G. (2012) Analysis of Rumen Methanogen Diversity in Water Buffaloes ( *Bubalus bubalis* ) Under Three Different Diets. *Microb Ecol* 64, pp. 131–139.

Furusawa, N. & Morita, Y. (2000) Polluting Profiles of Dieldrin and DDTs in Laying Hens of Osaka , Japan. *Journal of Veterinary Medicine* 47, pp. 511–515.

Gagliostro, G.A., Negrette, M.S., Sager, G., Castelli, L., Antonacci, L.E., Raco, F., Gallelo, L., Zampatti, M.L. & Bernal, C. (2015) Milk fatty acid profile from grazing buffaloes fed a blend of soybean and linseed oils. *Arq. Bras. Med. Vet. Zootec.* 67(3), pp. 927–934.

Genin, D., Villca, Z. & Abasto, P. (2015) Diet selection and utilization by llama and sheep in a high altitude-arid rangeland of Bolivia. *Journal of Range Management* 47, pp. 245–248.

Ghebrehwet, T., Ibrahim, M.N.M. & Schiere, J.B. (1988) Response of Growing Bulls to Diets Containing Untreated or Urea-treated Rice Straw with Rice Bran Supplementation. *Biological Wastes*, pp. 269–280.

Greyling, J.P.C., Mmbengwa, V.M., Schwalbach, L.M.J. & Muller, T. (2004) Comparative milk production potential of Indigenous and Boer goats under two feeding systems in South Africa. *Small Ruminant Research* 55, pp. 97–105.

Van Hamme, V. & Machado Junior, P.C. *The effect on broiler performance of a corn and soybean meal diet supplementation with a synergistic butyrate based product.*

Hassan, I.A.G., Elzubeir, E.A. & Tinay, A.H. El (2003) Growth and Apparent Absorption of Minerals in Broiler Chicks Fed Diets with Low or High Tannin Contents. *Tropical animal health and production* 35, pp. 189–196.

Hossain, M.E., Chakma, S., Khatun, M.M., Hasanuzzaman, M., Miah, M.Y. & Biswas, M.A.A. (2011) Production systems of swine in the rural areas of Rangamati and Khagrachari districts of Bangladesh. *Bangladesh Journal of Animal Science* 40(1-2), pp. 28–33.

Hulshof, R.B.A., Berndt, A., Gerrits, W.J.J., Zijderveld, S.M. Van, Newbold, J.R. & Perdok, H.B. (2012) Dietary nitrate supplementation reduces methane emission in beef cattle fed sugarcane-based diets. *Journal of Animal Science* 90, pp. 2317–2323.

Huque, K.S. (2006) A performance profile of dairying in Bangladesh - programs , policies and way forwards. *Bangladesh Journal of Animal Science* 43(2), pp. 81–103.

Ilemobade, A.A. & Balogun, T.F. (1981) Pig Trypanosomiasis: Effects of Infectino on feed intake, liveweight gain and carcass traits. *Tropical animal health and production* 13, pp. 128–136.

Islam, M.A., Uddin, M.E., Jahan, R., Wadud, A. & Sarkar, M.M. (2013) Metabolites in the milk of buffalo , Holstein cross , indigenous and Red Chittagong cattle of Bangladesh. *Bangladesh Journal of Animal Science* 42(2), pp. 152–157.

Islam, S.S., Khan, M.J., Bhuiyan, F.H., Islam, M.N. & Barua, S. (2010) The value of protein-rich supplements on the performance of Red Chittagong heifers (*Bos indicus*) fed urea molasses straw-based diet. *Tropical animal health and production* 42, pp. 1505–1511.

Jin, L.Z., Ho, Y.W., Abdullah, N. & Jalaludin, S. (1996) Influence of dried *Bacillus subtilis* and *Lactobacilli* Cultures on Intestinal Micorflora and Performance in Broilers. *AJAS* 9(4), pp. 397–403.

Jones, R. (2002) *ACIAR WORKING PAPER Priorities for Pig Research in Southeast Asia and the Pacific to 2010*.

Kana, J.R., Teguia, A., Mungfu, B.M. & Tchoumboue, J. (2011) Growth performance and carcass characteristics of broiler chickens fed diets supplemented with graded levels of charcoal from maize cob or seed of *Canarium schweinfurthii* Engl. *Tropical animal health and production* 43, pp. 51–56.

Kebreab, E., France, J., Phipps, R.H. & Leeson, S. (2005) Potential Cost and Environmental Impact of Feeding High-Oil Corn to Poultry in Brazil. *Journal of Applied Poultry Research* 14, pp. 463–475.

Khalili, H. & Varvikko, T. (1992) Effect of replacement of concentrate mix by wilted sesbania ( *Sesbania sesban* ) forage on diet digestibility , rumen fermentation and milk production in Friesian x Zebu ( Boran ) crossbred cows fed low quality native hay. *Animal Feed Science and Technology* 36, pp. 275–286.

Kunavongkrit, A. & Heard, T.W. (2000) Pig reproduction in South East Asia. *Animal Reprodu* 60-61, pp. 527–533.

Ledin, I., Sidibe-anago, A.G. & Ouedraogo, G.A. (2006) Effect of partly replacing cottonseed cake with *Mucuna* spp. ( var . Ghana ) hay on feed intake and digestibility , milk yield and milk composition of zebu cows. *Tropical animal health and production* 38, pp. 563–570.

Léis, C.M. De, Cherubini, E. & Ruviaro, C.F. (2015) Carbon footprint of milk production in Brazil : a comparative case study. *International Journal of Life Cycle Assessment* 20, pp. 46–60.

Lekule, F.P. & Ky, N.C. (2003) Impro v ing pig husbandry in tropical resource-poor communities and its potential to reduce risk of porcine cysticercosis. *Acta Tropica* 87, pp. 111–117.

Lemke, U., Kaufmann, B. & Thuy, L.T. (2007) Evaluation of biological and economic efficiency of smallholder pig production systems in North Vietnam. *Tropical animal health and production* 39, pp. 237–254.

Lemke, U., Kaufmann, B., Thuy, L.T., Emrich, K. & Zárate, A.V. (2006) Evaluation of smallholder pig production systems in North Vietnam : Pig production management and pig performances. *Livestock Science* 105, pp. 229–243.

Lemke, U. & Za, A.V. (2008) Dynamics and developmental trends of smallholder pig production systems in North Vietnam. *Agricultural Systems* 96, pp. 207–223.

Li, D., Zang, S., Li, T., Qiao, Q., Thacker, P.A. & Kim, J.H. (2000) Li et al 2000.pdf. *ASIAN AUSTRALASIAN JOURNAL OF ANIMAL SCIENCES* 13(11), pp. 1554–1560.

Loc, N.T., Ogle, B. & Preston, T.R. (1997) Protein supplementation of traditional diets for crossbred pigs under village conditions in Central Vietnam. *Livestock Research for Rural Development* 2(9).

Lu, L., Luo, X.G., Ji, C., Liu, B. & Yu, S.X. (2007) Effect of manganese supplementation and source on carcass traits , meat quality , and lipid oxidation in broilers 1. *Journal of Animal Science* 85, pp. 812–822.

Luo, T., Yue, Q., Yan, M., Cheng, K. & Pan, G. (2015) Carbon footprint of China ' s livestock system e a case study of farm survey in Sichuan province , China. *Journal of Cleaner Production* 102, pp. 136–143. Available at: <http://dx.doi.org/10.1016/j.jclepro.2015.04.077>.

Ly, J., Ty, C. & Samkol, P. (2003) N balance studies in young Mong Cai and Large White pigs fed high fibre diets based on wheat bran. *Livestock Research for Rural Development* 15(1).

Makembe, N.E.T. & Ndlovu, L.R. (1996) supplementary feed to maize stover for indigenous female goats in Zimbabwe. *Small Ruminant Research* 21, pp. 31–36.

Malavanh, C. & Preston, T.R. (2006) Intake and digestibility by pigs fed different levels of sweet potato leaves and water spinach as supplements to a mixture of rice bran and cassava root meal. *Livestock Research for Rural Development* 18(6).

Malavanh, C., Preston, T.R. & Ogle, B. (2008) Effect of replacing soybean meal by a mixture of taro leaf silage and water spinach on reproduction and piglet performance in Mong Cai gilts. *Livestock Research for Rural Development* 20.

Manjeli, Y., Tegua, A., Djoukam, J. & Tchoumboue, J. (1996) Effect of Feeding Cattle Manure on Growth Performance and Carcass Characteristics of Large White Pigs. *Tropical animal health and production* 28, pp. 307–311.

Marjuki, Zemmeling, G. & Ibrahim, M.N.M. (2000) Cattle Production on Small Holder Farms in East Java, Indonesia: II. Feeds and Feeding Practices. *ASIAN AUSTRALASIAN JOURNAL OF ANIMAL SCIENCES* 13(2), pp. 226–235.

Megersa, T., Urge, M. & Nurfeta, A. (2013) Effects of feeding sweet potato (Ipomoea batatas) vines as a supplement on feed intake, growth performance, digestibility and carcass characteristics of Sidama goats fed a basal diet of natural grass hay. *Tropical animal health and production* 45, pp. 593–601.

Minh, D. V & Ogle, B. (2005) Effect of Scavenging and Supplementation of Lysine and Methionine on the Feed Intake, Performance and Carcass Quality of Improved Dual-Purpose Growing Chickens. *Tropical animal health and production* 37, pp. 573–587.

Miranda, F., Junior, D.V., Martins, C.F., Leão, A.G., Rodrigo, A., Fernandes, M. & Teixeira, A. (2014) The effect of sex and genotype on growth performance, feed efficiency, and carcass traits of local sheep group Pantaneiro and Texel or Santa Inês crossbred finished on feedlot. *Tropical animal health and production* 46, pp. 869–875.

Mohammed, K.A.F., Sarmiento-franco, L., Santos-ricalde, R. & Solorio-sanchez, J.F. (2012) The nutritional effect of Moringa oleifera fresh leaves as feed supplement on Rhode Island Red hen egg production and quality. *Tropical animal health and production* 44, pp. 1035–1040.

Moreira, I., Fraga, A.L., Paiano, D. & Oliveira, G.C. De (2004) Nitrogen Balance of Starting Barrow Pigs Fed on Increasing Lysine Levels. *Brazilian Archives of Biology and Technology* 47(1), pp. 85–91.

Mutua, F.K., Dewey, C., Arimi, S., Ogara, W., Levy, M. & Schelling, E. (2012) ORIGINAL RESEARCH A description of local pig feeding systems in village smallholder farms of Western Kenya. *Tropical animal health and production* 44, pp. 1157–1162.



Nakai, S. (2008) Decision-making on the use of diverse combinations of agricultural products and natural plants in pig feed : a case study of native pig smallholder in northern Thailand. *Tropical animal health and production* 40, pp. 201–208.

Ncude, M., Dzama, K., Chimonyo, M., Kanengoni, A. & Hamudikuwanda, H. (2003) Effect of boar genotype on reproductive performance of the local sows of Zimbabwe. *Livestock Research for Rural Development* 15(2).

Ndindana, W., Dzama, K. & Ndiweni, P.N.B. (2002) Digestibility of high <sup>®</sup> bre diets and performance of growing Zimbabwean indigenous Mukota pigs and exotic Large White pigs fed maize based diets with graded levels of maize cobs. *Animal Feed Science and Technology* 97, pp. 199–208.

Newbold, J.R., Zijderveld, S.M. Van, Hulshof, R.B.A., Fokkink, W.B., Leng, R.A., Terencio, P., Powers, W.J., Adrichem, P.S.J. Van, Paton, N.D., Perdok, H.B., England, N., Ltda, N.A., Bonifacio, A.J. & Tecnologia, P. De (2014) The effect of incremental levels of dietary nitrate on methane emissions in Holstein steers and performance in Nelore bulls 1 study effects of dietary nitrate on enteric methane Experiments were conducted at Michigan State. *Journal of Animal Science* 92, pp. 5032–5040.

Ngongoni, N.T., Mapiye, C., Mwale, M. & Mupeta, B. (2006) Factors affecting milk production in the smallholder dairy sector of Zimbabwe. *Livestock Research for Rural Development* 18(6).

Niraula, K., Ibrahim, F. & Stewart, T. (2015) *A STUDY ON THE ROLE OF WOMEN IN THE PIG SECTOR IN KAILALI & DHANKUTA DISTRICTS, NEPAL.*

Nsoso, S.J., Mannathoko, G.G. & Modise, K. (2006) Monitoring production , health and marketing of indigenous Tswana pigs in Ramotswa village of Botswana. *Livestock Research for Rural Development* 18(9).

Nyamangara, M.E. & Ndlovuf, L.R. (1995) Feeding behaviour , feed intake , chemical and botanical composition of the diet of indigenous goats raised on natural vegetation in a semi-arid region of Zimbabwe. *Journal of Agricultural Science* 124, pp. 455–461.

Oddoye, E.O.K., Takrama, J.F. & Anchirina, V. (2009) Effects on performance of growing pigs fed diets containing different levels of dried cashew pulp. *Tropical animal health and production* 41, pp. 1577–1581.

Ogino, A., Kaku, K., Osada, T. & Shimada, K. (2004) Environmental impacts of the Japanese beef-fattening system with different feeding lengths as evaluated by a life-cycle assessment method 1. *Journal of Animal Science* 82, pp. 2115–2122.

Okagbare, G.O., Akpodiete, O.J., Esiekpe, O. & Onagbesan, O.M. (2004) Short Communication Evaluation of Gmelina arborea Leaves Supplemented with Grasses ( Panicum Maximum and

Pennisetum purpureum ) as Feed for West African Dwarf Goats. *Tropical animal health and production* 36, pp. 593–598.

Oshita, T., Takayama, H., Otsuka, H. & Igarashi, H. (2007) Effects of Maturing Stage of Corn Hybrids on Silage Yield , Feeding Value for Dairy Cows and Milk Production in a Cold Region of Japan. *ASIAN AUSTRALASIAN JOURNAL OF ANIMAL SCIENCES* 20(4), pp. 511–516.

Paris, T.R. (2002) Crop – animal systems in Asia : socio-economic benefits and impacts on rural livelihoods. *Agricultural Systems* 71, pp. 147–168.

Pattanaik, A.K., Jadhav, S.E., Dutta, N., Verma, A.K. & Bhuyan, R. (2015) ECO-RESPONSIVE FEEDING AND NUTRITION: Linking Livestock and Livelihood.

Pereyra, C.M. & Ramí, M.L. (2008) Determination of mycobiota and mycotoxins in pig feed in central Argentina. *Letters in Applied Microbiology* 46, pp. 555–561.

Permin, A., Yelifari, L., Bloch, P., Steenhard, N. & Hansen, N.P. (1999) Parasites in cross-bred pigs in the Upper East Region of Ghana. *Veterinary parasitology* 87, pp. 63–71.

Peters, D. (2004) Review Article Use of sweet potato in pig production in Asia: agricultural and socio-economic aspects. *Pig News and Information* 25(4).

Peters, D., Tinh, N.T., Hoan, M.T., Yen, N.T., Thach, P.N. & Fuglie, K. (2005) Rural income generation through improving crop-based pig production systems in Vietnam : Diagnostics , interventions , and dissemination. *Agriculture and Human Values* 22, pp. 73–85.

Pfister, J.A. & Malechek, J.C. (2015) Dietary Selection by Goats and Sheep in a Deciduous Woodland of Northeastern Brazil. *Journal of Range Management* 39(1), pp. 24–28.

Picasso, V.D., Modernel, P.D., Becoña, G., Salvo, L., Gutiérrez, L. & Astigarraga, L. (2014) Sustainability of meat production beyond carbon footprint : a synthesis of case studies from grazing systems in Uruguay. *Meat science* 98, pp. 346–354. Available at: <http://dx.doi.org/10.1016/j.meatsci.2014.07.005>.

Poncheki, J.K., Luíza, M., Canha, S., Viechnieski, S.L. & Almeida, R. De (2015) Revista Brasileira de Zootecnia Analysis of daily body weight of dairy cows in early lactation and associations with productive and reproductive performance. *R. Bras. Zootec.* 44(5), pp. 187–192.

Rahman, M.M., Akbar, M.A., Islam, K.M.S., Khaleduzzaman, A.B.M. & Bostami, A.B.M.R. (2009) NUTRIENT DIGESTIBILITY AND GROWTH RATE OF BULL CALVES FED RICE STRAW TREATED WITH WOOD ASH EXTRACT. *Bangladesh Journal of Animal Science* 38(1&2), pp. 42–52.

Rahman, S., Barthakur, S. & Kalita, G. (2008) Pig production and management system in Aizawl District of Mizoram, India. *Livestock Research for Rural Development* 20(9).

Rey, B. & Das, S.M. (1997) A Systems Analysis of Inter-annual Changes in the Pattern of Sheep Flock Productivity in Tanzanian Livestock Research Centres. *Agricultural Systems* 53, pp. 175–190.

Romero-sanchez, H. (2007) Poultry Nutrition and Production in Andean Countries.

Roy, S.C., Alam, M.S., Ali, M.A. & Goswami, C. (2010) DIFFERENT LEVELS OF PROTEIN ON THE PERFORMANCE OF. *Bangladesh Journal of Veterinary Medicine* 8(2), pp. 117–122.

Rufino, M.C., Tittonell, P., Wijk, M.T. Van & Castellanos-navarrete, A. (2007) Manure as a key resource within smallholder farming systems : Analysing farm-scale nutrient cycling efficiencies with the NUANCES framework. *Livestock Science* 112, pp. 273–287.

Sahoo, A., Chaudhary, L.C., Agarwal, N., Kamra, D.N. & Pathak, N.N. (2000) Effect of Feeding Different Ratios of Green Fodder and Straw Supplemented with Wheat Bran on the Performance of Male Crossbred Calves. *ASIAN AUSTRALASIAN JOURNAL OF ANIMAL SCIENCES* 13(1), pp. 19–22.

Salgado, P., Thang, V.Q., Thu, T. V & Richard, D. (2013) Oats ( *Avena strigosa* ) as winter forage for dairy cows in Vietnam : an on-farm study. *Tropical animal health and production* 45, pp. 561–568.

Sarwar, M., Shahzad, M.A., Nisa, M. & Amjad, S. (2011) Nutrient intake , acid base status and weight gain in water buffalo calves fed different dietary levels of sodium bicarbonate. *South African Journal of Animal Science (South Africa)* 41(2).

Shahzad, M.A., Nisa, M. & Sarwar, M. (2011) Nutrient utilization and milk yield response of early lactating Nili-Ravi buffaloes fed on urea – molasses treated wheat straw fermented with cattle manure. *Livestock Science* 139(3), pp. 271–276. Available at: <http://dx.doi.org/10.1016/j.livsci.2011.01.008>.

Shariatmadari, F. (2000) Poultry production and the industry in Iran. *World's Poultry Science Journal* 56(March).

Srinongkote, S., Smriga, M. & Toride, Y. (2004) Diet supplied with L-lysine and L-arginine during chronic stress of high stock density normalizes growth of broilers. *Animal Science Journal* 75, pp. 339–343.

Thieu, N.Q., Ogle, B. & Pettersson, H. (2008) Efficacy of bentonite clay in ameliorating aflatoxicosis in piglets fed aflatoxin contaminated diets. *Tropical animal health and production* 40, pp. 649–656.

Touqir, N.A., Khan, M.A., Sarwar, M. & Ali, C.S. (2007) Feeding Value of Jambo Grass Silage and Mott Grass Silage for Lactating Nili Buffaloes. *ASIAN AUSTRALASIAN JOURNAL OF ANIMAL SCIENCES* 20(4), pp. 523–528.

Tra, H.T.H. (2003) Assessing Input in Pig Production with Special Focus on Feed Resources and Feeding Management in Demand and Resource Driven Production Systems in Son La Province , Vietnam.

Tu, P.K., Hoang, N.D., Duc, N. Le, Hendriks, W.H. & Verstegen, M.W.A. (2010) Nutritional Constraints and Possibilities for Pig Production on Smallholders Farms in Central Vietnam. *ASIAN AUSTRALASIAN JOURNAL OF ANIMAL SCIENCES* 23(2), pp. 253–262.

Tuah, A.K. (2015) Utilisation of agricultural by-products for village and commercial production of sheep rations in Ghana [Online]. Available at: H:\FAO\Lit\Small Ruminants\SSA Small Ruminants\Tuah.htm.

Vadivel, V. & Pugalenth, M. (2010) Studies on the incorporation of velvet bean ( *Mucuna pruriens* var . *utilis* ) as an alternative protein source in poultry feed and its effect on growth performance of broiler chickens. *Tropical animal health and production* 42, pp. 1367–1376.

Varvikko, T. & Khalili, H. (1993) forage as a replacement for a concentrate supplement for lactating crossbred Friesian x Zebu ( Boran ) dairy cows fed low- quality native hay. *Animal Feed Science and Technology* 40, pp. 239–250.

Vu, T.K. V, Sommer, G.S., Vu, C.C. & Jørgensen, H. (2010) Assessing Nitrogen and Phosphorus in Excreta from Grower-finisher Pigs Fed Prevalent Rations in Vietnam. *ASIAN AUSTRALASIAN JOURNAL OF ANIMAL SCIENCES* 23(2), pp. 279–286.

Wafula, S., Kirui, J. & Lukuyu, B. (2015) Characterization of the Livestock Production Systems and the Potential of Feed- based Interventions for Improving Livestock Productivity in Cheborgei , Roret and Buret Division in Kericho County ( Kenya ) By Sylvia Wafula ( ICRAF ), Josephine Kirui ( ICRA ).

Wanapat, M., Foiklang, S. & Rowlinson, P. (2012) Effect of carbohydrate sources and cotton seed meal in the concentrate : II . Feed intake , nutrient digestibility , rumen fermentation and microbial protein synthesis in beef cattle. *Tropical animal health and production* 44, pp. 35–42.

York, L. (2010) Characterisation of the livestock production system and the potential of feed - based interventions for improving livestock productivity in Monomothpur and Khairpara village , in the Dinajpur district of northern. (September), pp. 1–18.

York, L. (2010) Characterisation of the livestock production system and the potential of feed - based interventions in the municipality of Ratnanagar and Gitanagar in the Chitwan district of southern Nepal , September 2010.
